# Supplementary material
Source: PubMed Central journal article supplement (PMC6279613)

## Supplementary Table S1: Characteristics of patients in a clinical trial of intraoperative gemcitabine infusion during surgery

| Patient | Sex    | Age | Race      | Differentiation/Histology |
|---------|--------|-----|-----------|---------------------------|
| 1       | female | 59  | Caucasian | Poor/Adeno                |
| 2       | female | 62  | Black     | Poor/Adeno                |
| 3       | female | 63  | Caucasian | Mod/Adeno                 |
| 4       | male   | 64  | Caucasian | Poor/Adeno                |
| 5       | female | 68  | Black     | Mod/Adeno                 |
| 6       | female | 55  | Caucasian | Mod/Adeno                 |
| 7       | female | 60  | Caucasian | Mod/Adeno                 |
| 8       | male   | 77  | Caucasian | Poor/Adeno                |
| 9       | male   | 56  | Hispanic  | Mod/Adeno                 |
| 10      | male   | 64  | Caucasian | Poor/Adeno                |
| 11      | female | 69  | Caucasian | Mod/Adeno                 |
| 12      | female | 56  | Caucasian | Mod/Adeno                 |

Abbreviations: Mod=moderately differentiated, Poor=poorly differentiated, Adeno=adenocarcinoma

## Supplementary Table S2: Patients who underwent surgical resection of PDAC without prior therapy (n = 101)

| Characteristic                         | All patients | High delta | Low delta  | P value |
|----------------------------------------|--------------|------------|------------|---------|
| <b>Median age (range)</b>              | 64 (25-85)   | 65 (25-85) | 61 (39-81) | 0.05    |
| <b>Sex</b>                             |              |            |            | 0.10    |
| Male                                   | 55 (54%)     | 21 (46%)   | 34 (62%)   |         |
| Female                                 | 46 (46%)     | 25 (54%)   | 21 (38%)   |         |
| <b>Anatomical location of PDAC</b>     |              |            |            | 0.30    |
| Head                                   | 81 (80%)     | 34 (74%)   | 47 (85%)   |         |
| Body                                   | 11 (11%)     | 6 (13%)    | 5 (9%)     |         |
| Tail                                   | 9 (9%)       | 6 (13%)    | 3 (5%)     |         |
| <b>Pathologic T stage</b>              |              |            |            | 0.29    |
| T1                                     | 1 (1%)       |            | 1 (2%)     |         |
| T2                                     | 1 (1%)       |            | 1 (2%)     |         |
| T3                                     | 98 (97%)     | 46 (100%)  | 52 (95%)   |         |
| T4                                     | 1 (1%)       |            | 1 (2%)     |         |
| <b>Pathologic N stage</b>              |              |            |            | 0.09    |
| N0                                     | 19 (19%)     | 5 (11%)    | 13 (24%)   |         |
| N1                                     | 82 (81%)     | 41 (89%)   | 42 (76%)   |         |
| <b>Surgical margin</b>                 |              |            |            | 0.72    |
| Positive                               | 14 (14%)     | 7 (15%)    | 7 (13%)    |         |
| Negative                               | 87 (86%)     | 39 (85%)   | 48 (87%)   |         |
| <b>Adjuvant chemotherapy</b>           |              |            |            | 0.03    |
| Yes                                    | 76 (75%)     | 30 (65%)   | 46 (84%)   |         |
| No                                     | 25 (25%)     | 16 (35%)   | 9 (16%)    |         |
| <b>Adjuvant chemoradiation</b>         |              |            |            | 0.03    |
| Yes                                    | 33 (34%)     | 10 (22%)   | 23 (42%)   |         |
| No                                     | 68 (67%)     | 36 (78%)   | 32 (58%)   |         |
| <b>Median tumor size in cm (range)</b> | 3 (1-8)      | 3 (1.2-8)  | 3 (1-7.5)  | 0.14    |

## Supplementary Table S3: Patients who received neoadjuvant gemcitabine-based chemoradiation for resectable PDAC (n = 106)

| Characteristic                         | Value (range or %) | High delta  | Low delta   | P value |
|----------------------------------------|--------------------|-------------|-------------|---------|
| <b>Median age (range)</b>              | 63 (44-80)         | 66 (44-80)  | 62 (51-78)  | 0.047   |
| <b>Sex</b>                             |                    |             |             | 0.01    |
| Male                                   | 61 (58%)           | 27 (47%)    | 34 (71%)    |         |
| Female                                 | 45 (42%)           | 31 (53%)    | 14 (29%)    |         |
| <b>Surgery</b>                         |                    |             |             | 0.12    |
| Yes                                    | 76 (72%)           | 38 (66%)    | 38 (79%)    |         |
| No                                     | 30 (28%)           | 20 (34%)    | 10 (21%)    |         |
| <b>Pathological T stage</b>            |                    |             |             | 0.31    |
| T1                                     | 8 (11%)            | 2 (5%)      | 6 (16%)     |         |
| T2                                     | 9 (12%)            | 5 (13%)     | 4 (11%)     |         |
| T3                                     | 59 (77%)           | 31 (82%)    | 28 (74%)    |         |
| T4                                     | 0 (0%)             | 0           | 0           |         |
| <b>Pathological N stage</b>            |                    |             |             | 0.36    |
| N0                                     | 36 (47%)           | 16 (42%)    | 20 (53%)    |         |
| N1                                     | 40 (53%)           | 22 (58%)    | 18 (47%)    |         |
| <b>Median tumor size in cm (range)</b> | 2.5 (0.4-6)        | 2.8 (0.6-5) | 2.2 (0.4-6) | 0.20    |

## Supplementary Table S4: Patients with metastatic disease at presentation (n = 84)

| Characteristic            | Value      |
|---------------------------|------------|
| <b>Median age (range)</b> | 61 (36-86) |
| <b>Sex</b>                |            |
| Male                      | 49 (58%)   |
| Female                    | 35 (42%)   |
| <b>Clinical T Staging</b> |            |
| T1/T2                     | 24 (29%)   |
| T3                        | 18 (21%)   |
| T4                        | 42 (50%)   |
| <b>Cytotoxic regimen</b>  |            |
| Gem                       | 5 (6%)     |
| Gem-Cisplatin             | 13 (15%)   |
| Gem-Abraxane              | 11 (13%)   |
| FOLFIRINOX                | 55 (66%)   |

Abbreviations: Gem=gemcitabine

**Supplementary Table S5: Univariate and multivariate overall survival analyses of patients with metastatic disease at presentation (see Supplementary Table S4 for patient characteristics)**

| Characteristic                  | No. of patients | Univariate Hazard ratio (95% CI) | Univariate P value | Multivariate Hazard ratio (95% CI) | Multivariate P value |
|---------------------------------|-----------------|----------------------------------|--------------------|------------------------------------|----------------------|
| <b>Delta with cut-off of 40</b> | 84              |                                  |                    |                                    |                      |
| High delta (delta≥40)           | 65              | --                               |                    | --                                 |                      |
| Low delta (delta<40)            | 19              | 0.47 (0.23-0.88)                 | 0.016              | 0.45 (0.22-0.87)                   | 0.016                |
| <b>Tumor size (cm)</b>          | 84              | 1.18 (1.05-1.3)                  | 0.007              | 1.22 (1.06-1.39)                   | 0.004                |
| <b>Chemotherapeutic regimen</b> | 84              |                                  |                    |                                    |                      |
| Gem                             | 5               | --                               |                    | --                                 |                      |
| Gem-Cisplatin                   | 13              | 0.58 (0.13-1.86)                 | 0.38               | 1.18 (0.25-4.01)                   | 0.81                 |
| Gem-Abraxane                    | 11              | 1.25 (0.27-4.34)                 | 0.74               | 2.14 (0.45-7.81)                   | 0.31                 |
| FOLFIRINOX                      | 55              | 0.89 (0.21-2.48)                 | 0.85               | 1.50 (0.36-4.34)                   | 0.53                 |

# Supplementary Table S6: Univariate and multivariate overall survival analyses of patients who underwent upfront surgery for resectable PDAC (see Supplementary Table S2 for patient characteristics)

| Characteristic                     | No. of patients | Univariate Hazard ratio (95% CI) | Univariate P value | Model A: Hazard ratio (95% CI) | Model A: P value | Model B: Hazard Ratio (95% CI) | Model B: P value | Model C: Hazard Ratio (95% CI) | Model C: P value | Model D: Hazard Ratio (95% CI) | Model D: P value |
|------------------------------------|-----------------|----------------------------------|--------------------|--------------------------------|------------------|--------------------------------|------------------|--------------------------------|------------------|--------------------------------|------------------|
| <b>Delta with cut-off of 40</b>    | 101             |                                  |                    |                                |                  |                                |                  |                                |                  |                                |                  |
| High delta (delta≥40)              | 46              | --                               |                    | --                             |                  | --                             |                  | --                             |                  | --                             |                  |
| Low delta (delta<40)               | 55              | 0.50 (0.32-0.79)                 | 0.003              | 0.61 (0.39-0.98)               | 0.040            | 0.63 (0.39-1.02)               | 0.059            |                                |                  | 0.63 (0.39-1.03)               | 0.065            |
| <b>Surgical margin</b>             | 101             |                                  |                    |                                |                  |                                |                  |                                |                  |                                |                  |
| Positive (R1)                      | 14              | 1.57 (0.83-2.98)                 | 0.166              | 1.41 (0.73-2.73)               | 0.30             |                                |                  |                                |                  |                                |                  |
| Negative (R0)                      | 87              | --                               |                    | --                             |                  |                                |                  |                                |                  |                                |                  |
| <b>Pathologic N stage</b>          | 101             |                                  |                    |                                |                  |                                |                  |                                |                  |                                |                  |
| N1                                 | 83              | 2.61 (1.34-5.10)                 | 0.005              | 2.73(1.36-5.48)                | 0.005            | 2.84 (1.41-5.69)               | 0.003            | 3.17 (1.59-6.32)               | 0.001            | 2.84 (1.41-5.72)               | 0.004            |
| N0                                 | 18              | --                               |                    | --                             |                  | --                             |                  | --                             |                  | --                             |                  |
| <b>Adjuvant chemotherapy</b>       | 101             |                                  |                    |                                |                  |                                |                  |                                |                  |                                |                  |
| Yes                                | 76              | 0.54 (0.33-0.90)                 | 0.017              | 0.51 (0.29-0.89)               | 0.018            | 0.50 (0.29-0.85)               | 0.011            | 0.46 (0.27-0.77)               | 0.003            | 0.50 (0.29-0.85)               | 0.011            |
| No                                 | 25              | --                               |                    | --                             |                  | --                             |                  | --                             |                  | --                             |                  |
| <b>Adjuvant chemoradiation</b>     | 101             |                                  |                    |                                |                  |                                |                  |                                |                  |                                |                  |
| Yes                                | 33              | 0.65 (0.40-1.05)                 | 0.07               | 0.79 (0.48-1.30)               | 0.35             |                                |                  |                                |                  |                                |                  |
| No                                 | 68              | --                               |                    | --                             |                  |                                |                  |                                |                  |                                |                  |
| <b>CA19-9 (per 100 units)</b>      | 101             | 1.00 (0.98-1.02)                 | 0.96               |                                |                  |                                |                  | 0.99 (0.98-1.01)               | 0.70             | 1.00 (0.98-1.02)               | 0.98             |
| <b>Gender</b>                      | 101             |                                  |                    |                                |                  |                                |                  |                                |                  |                                |                  |
| Male                               | 55              | 0.69 (0.45-1.08)                 | 0.102              |                                |                  | 0.77 (0.49-1.21)               | 0.25             | 0.70 (0.45-1.10)               | 0.13             | 0.77 (0.48-1.22)               | 0.26             |
| Female                             | 46              | --                               |                    |                                |                  |                                |                  |                                |                  |                                |                  |
| <b>Volumetric AUC</b>              | 101             | 0.34 (0.11-0.99)                 | 0.047              |                                |                  |                                |                  |                                |                  |                                |                  |
| <b>Anatomical location of PDAC</b> | 101             |                                  |                    |                                |                  |                                |                  |                                |                  |                                |                  |
| Head                               | 81              | --                               |                    |                                |                  |                                |                  |                                |                  |                                |                  |
| Body                               | 11              | 1.11 (0.54-2.01)                 | 0.7549             |                                |                  |                                |                  |                                |                  |                                |                  |
| Tail                               | 9               | 2.16 (1.00-4.17)                 | 0.0513             |                                |                  |                                |                  |                                |                  |                                |                  |
| <b>C-index (SE)</b>                |                 |                                  |                    | <b>0.677(0.037)</b>            |                  | <b>0.679 (0.036)</b>           |                  | <b>0.667 (0.037)</b>           |                  | <b>0.673 (0.037)</b>           |                  |

Abbreviations: No.=number, CI=confidence interval, AUC= area under the enhancement curve  
Note: Models B, C, and D were constructed using AIC backward selection approach and combined with the Delta and CA19-9 to determine effects on the C-index.

# Supplementary Table S7: Subgroup overall survival analysis of patients with stage T3 disease

|                         | Multivariate model<br>with Delta classification |                    | Multivariate model<br>with baseline CA19-9 |                 |
|-------------------------|-------------------------------------------------|--------------------|--------------------------------------------|-----------------|
|                         | HR (95% CI)<br>p-value                          | C-index(se)        | HR (95% CI)<br>p-value                     | C-index(se)     |
| <b>T3 N0<br/>(n=24)</b> | 0.209<br>(0.070, 0.622)<br>0.005                | 0.666<br>( 0.064 ) | 1.000<br>(1.000, 1.000)<br>0.471           | 0.572<br>(0.08) |
| <b>T3 N1<br/>(n=35)</b> | 0.194<br>(0.582, 2.446)<br>0.629                | 0.552<br>(0.052)   | 1.000<br>(1.000, 1.000)<br>0.857           | 0.544 (0.064)   |

Note: the multivariate model included adjuvant chemotherapy and gender, which were selected using the AIC backward selection approach (Model B in Table S6)

Abbreviations: se = standard error

**Supplementary Table S8: Univariate and multivariate overall survival analyses of patients who received gemcitabine-based chemoradiation for potentially resectable pancreatic cancer (see Supplementary Table S3 for patient characteristics)**

| Characteristic                             | No. of patients | Univariate Hazard ratio (95% CI) | Univariate P value | Model A: Multivariate Hazard ratio (95% CI) | Model A: Multivariate P value | Model B: Multivariate Hazard ratio (95% CI) | Model B: Multivariate P value | Model C: Multivariate Hazard ratio (95% CI) | Model C: Multivariate P value |
|--------------------------------------------|-----------------|----------------------------------|--------------------|---------------------------------------------|-------------------------------|---------------------------------------------|-------------------------------|---------------------------------------------|-------------------------------|
| <b>Delta with cut-off of 40</b>            | 106             |                                  |                    |                                             |                               |                                             |                               |                                             |                               |
| High delta (delta≥40)                      | 58              | --                               |                    | --                                          |                               |                                             |                               | --                                          |                               |
| Low delta (delta<40)                       | 48              | 0.46 (0.29-0.70)                 | 0.0004             | 0.49 (0.31-0.76)                            | 0.001                         |                                             |                               | 0.49 (0.31-0.76)                            | 0.002                         |
| <b>Underwent curative-intent resection</b> | 106             |                                  |                    |                                             |                               |                                             |                               |                                             |                               |
| Yes                                        | 76              | 0.12 (0.07-0.21)                 | <0.0001            | 0.12 (0.07-0.22)                            | <0.0001                       | 0.11 (0.06-0.19)                            | <0.0001                       | 0.11 (0.06-0.20)                            | <0.0001                       |
| No                                         | 30              | --                               |                    | --                                          |                               | --                                          |                               | --                                          |                               |
| <b>Volumetric AUC</b>                      | 106             | 0.43 (0.18-1.05)                 | 0.06               |                                             |                               |                                             |                               |                                             |                               |
| <b>Baseline CA19-9 (per 100 units)</b>     | 102             | 1.01 (0.99-1.02)                 | 0.50               |                                             |                               | 1.01 (0.99-1.02)                            | 0.18                          | 1.01 (0.99-1.03)                            | 0.14                          |
| <b>C-index (SE)</b>                        |                 |                                  |                    | 0.717 (0.032)                               |                               | 0.708 (0.035)                               |                               | 0.735 (0.035)                               |                               |

Abbreviations: se = standard error



**Supplementary Table S9: Univariate and multivariate overall survival analyses of patients who received neoadjuvant gemcitabine-based chemoradiation and underwent resection (see Supplementary Table S3 for patient characteristics)**

| <b>Characteristic</b>           | <b>No. of patients</b> | <b>Univariate Hazard ratio (95% CI)</b> | <b>Univariate P value</b> | <b>Multivariate Hazard ratio (95% CI)</b> | <b>Multivariate P value</b> |
|---------------------------------|------------------------|-----------------------------------------|---------------------------|-------------------------------------------|-----------------------------|
| <b>Delta with cut-off of 40</b> | 76                     |                                         |                           |                                           |                             |
| High delta (delta≥40)           | 38                     | --                                      |                           | --                                        |                             |
| Low delta (delta<40)            | 38                     | 0.46 (0.27-0.77)                        | 0.0032                    | 0.49 (0.27-0.84)                          | 0.0104                      |
| <b>Surgical margin</b>          | 76                     |                                         |                           |                                           |                             |
| Positive (R1)                   | 2                      | 1.44 (0.24-4.64)                        | 0.63                      | 1.10 (0.17-3.92)                          | 0.90                        |
| Negative (R0)                   | 74                     | --                                      |                           | --                                        |                             |
| <b>N stage</b>                  | 76                     |                                         |                           |                                           |                             |
| N1                              | 40                     | 1.42 (0.87-2.36)                        | 0.17                      | 1.18 (0.69-2.03)                          | 0.56                        |
| N0                              | 36                     | --                                      |                           | --                                        |                             |
| <b>Volumetric AUC</b>           | 76                     | 0.36 (0.12-1.06)                        | 0.06                      |                                           |                             |

# Supplementary Fig. S1: Consort flow chart for all cohorts

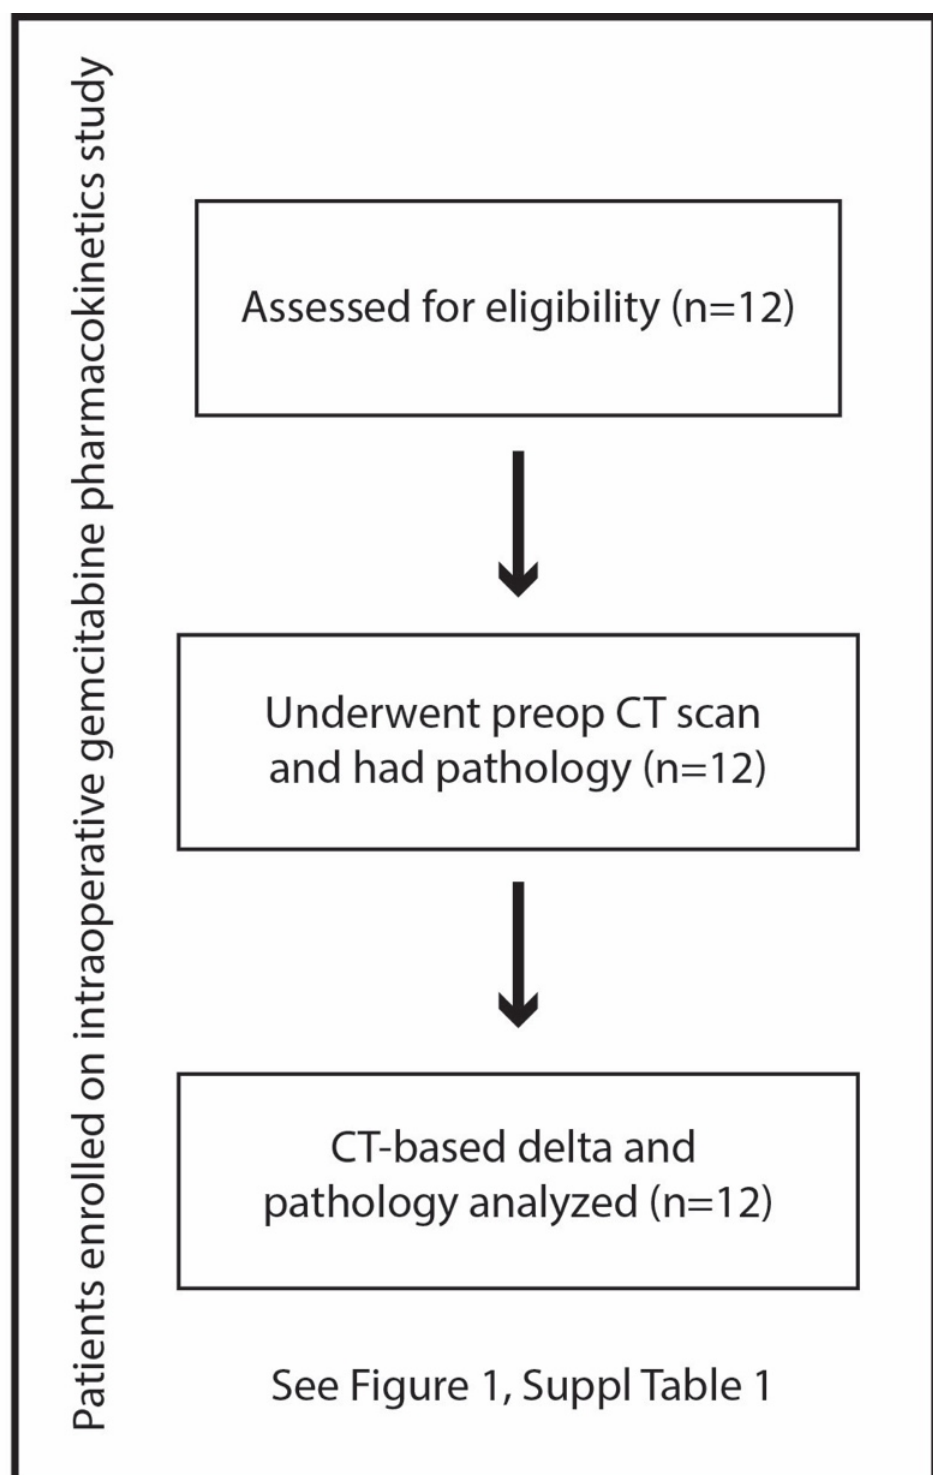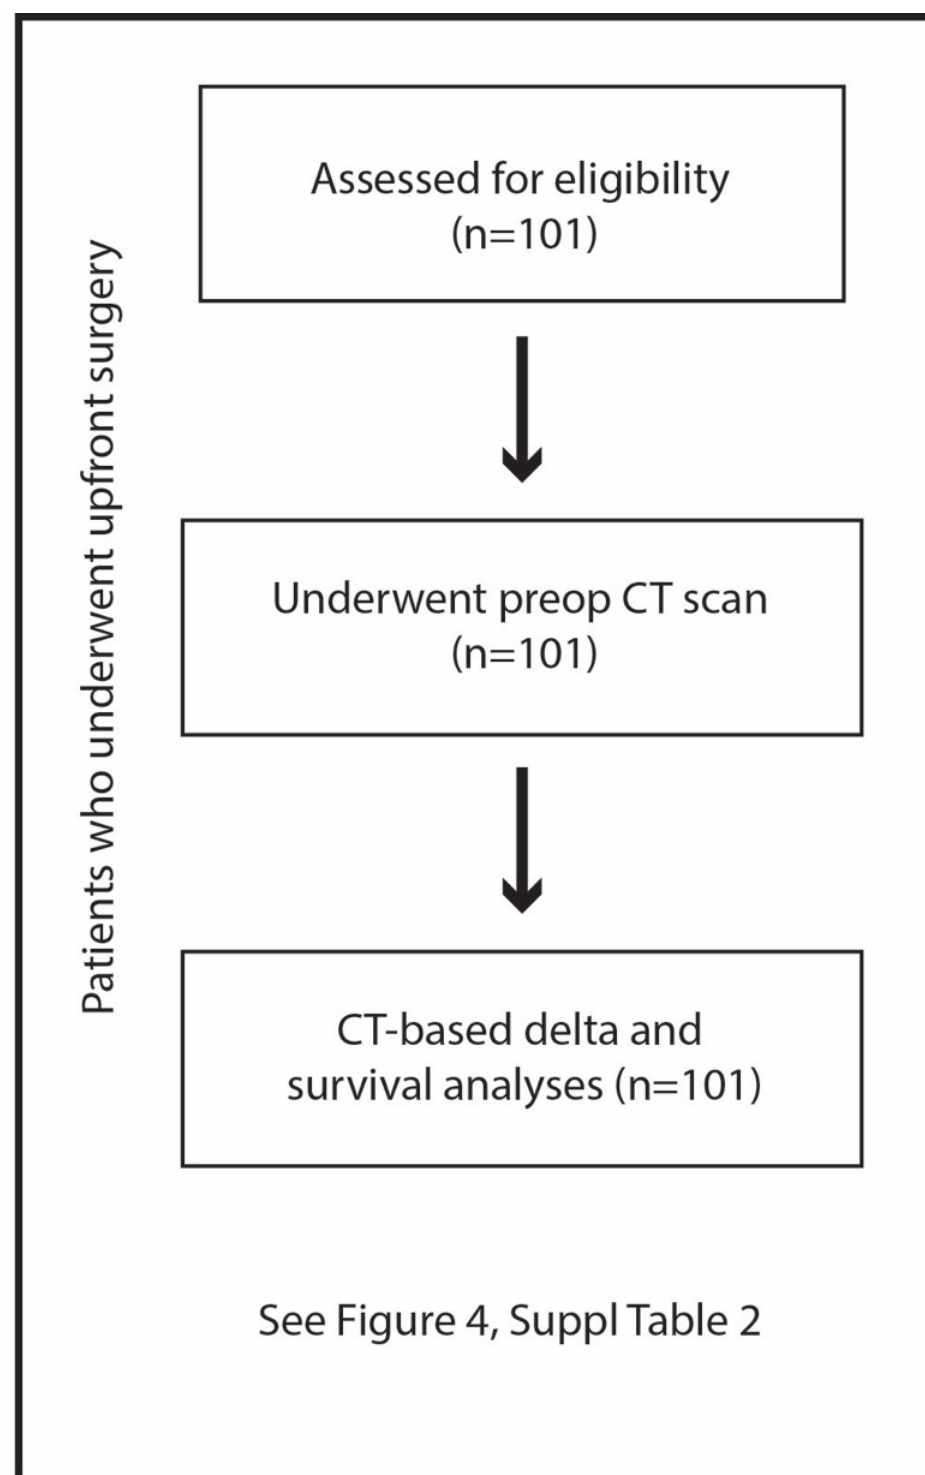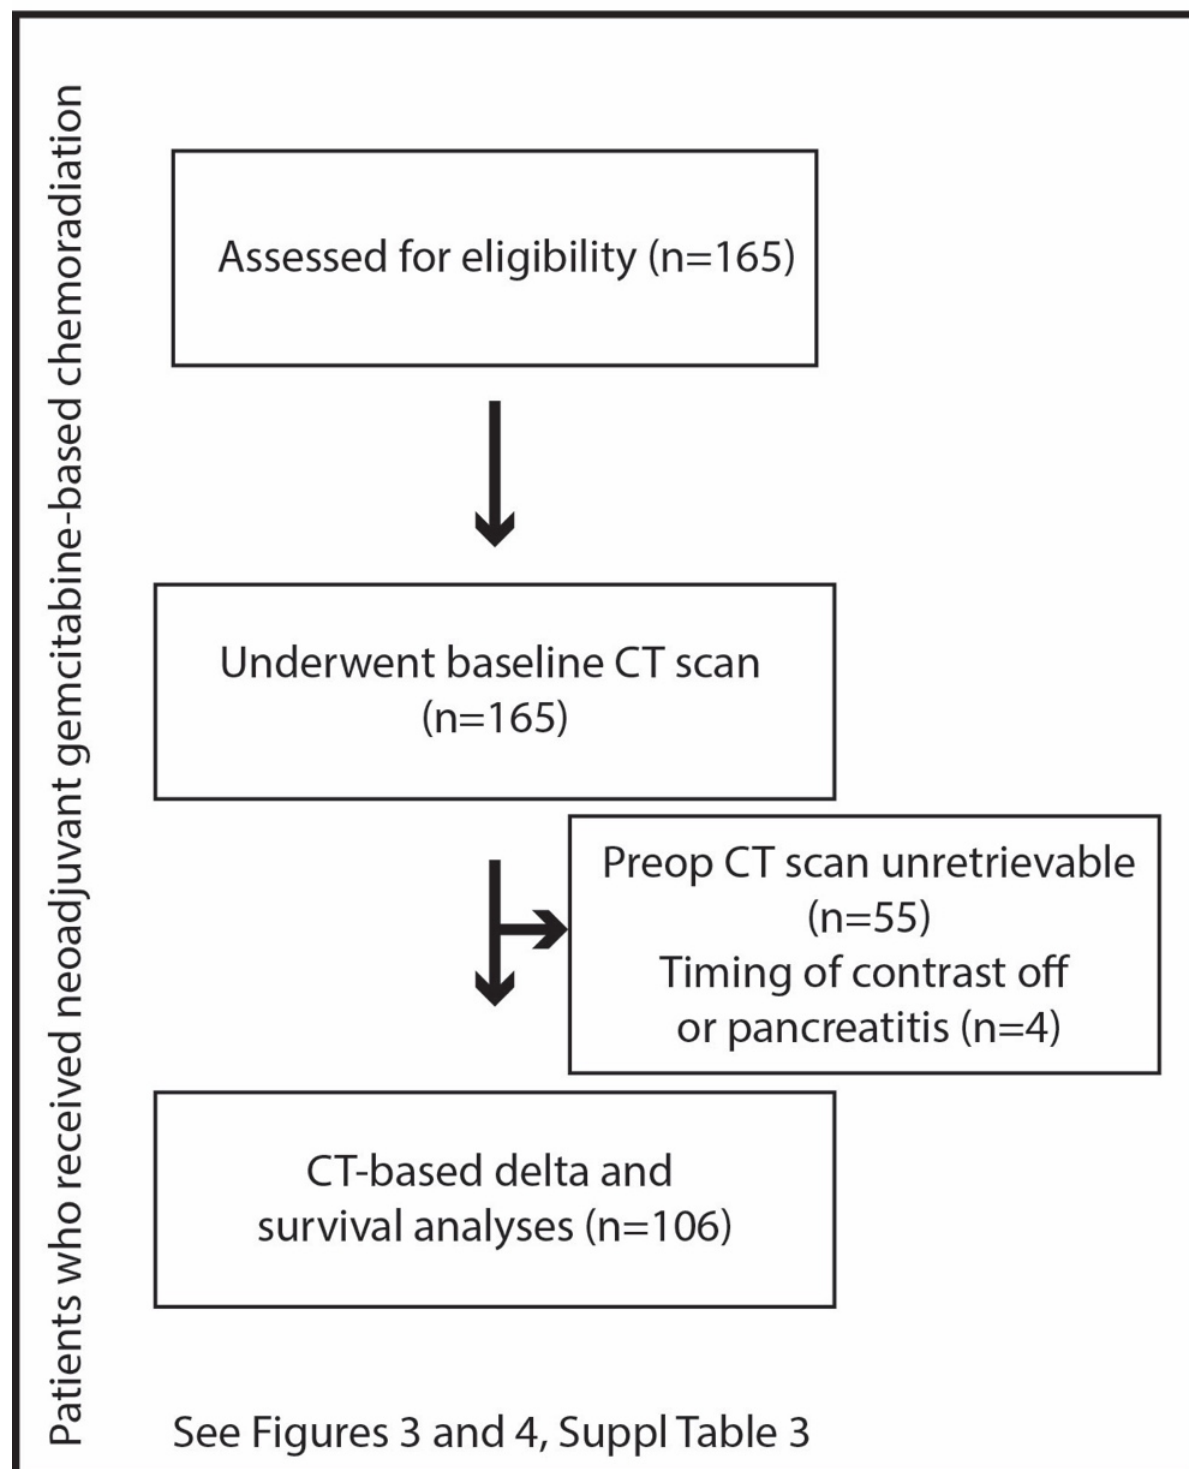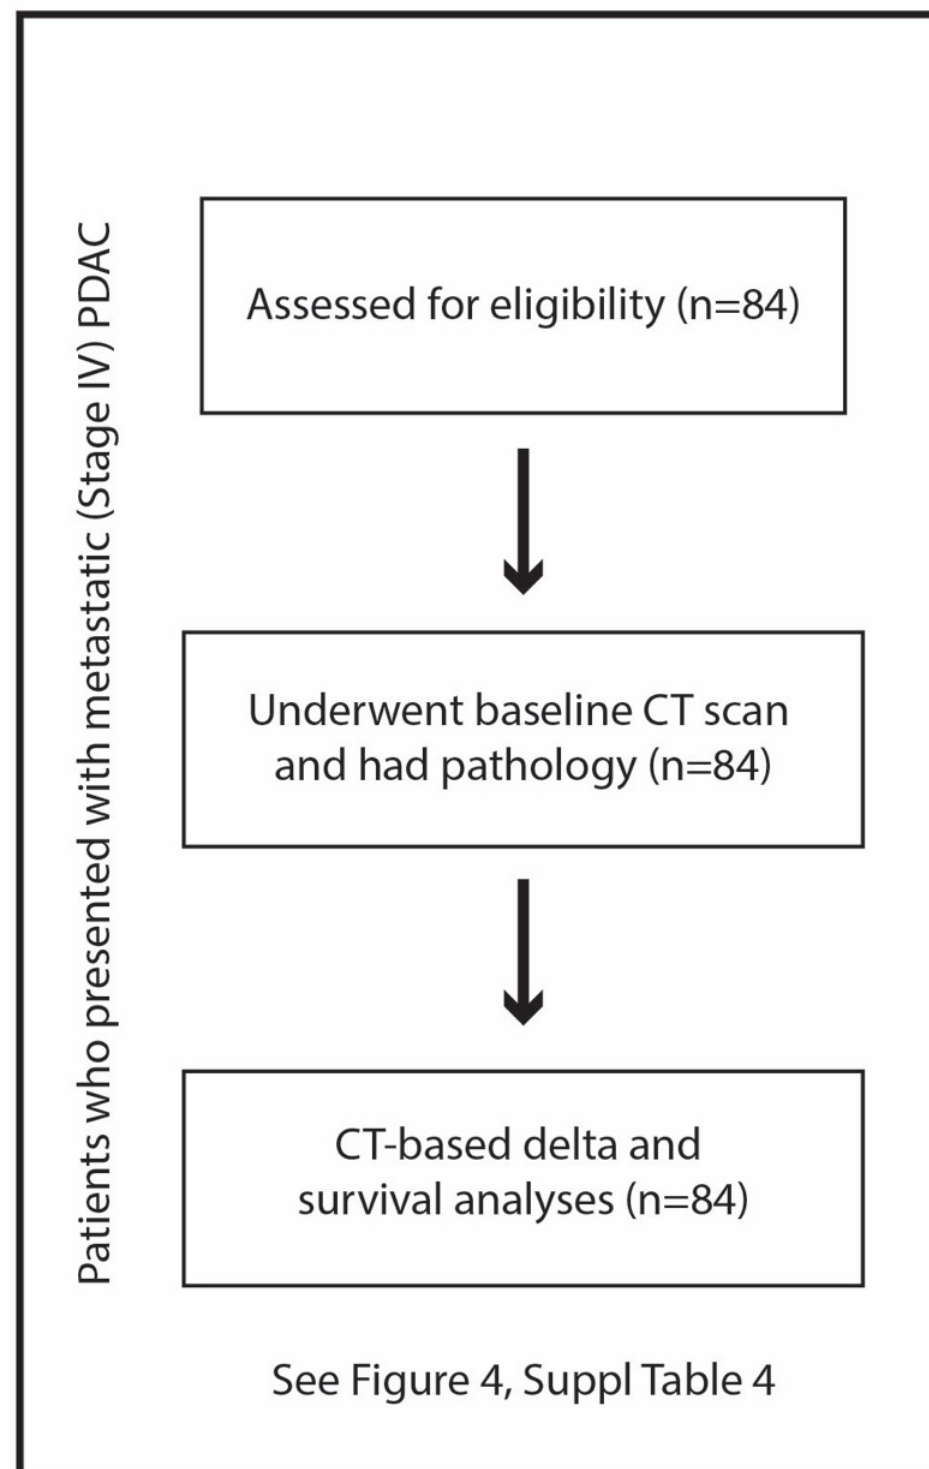

# Supplementary Fig. S2: Five-point scoring system for the conspicuity of PDAC tumors on diagnostic CT scans

5: Very conspicuous; 1: Very inconspicuous (top). Corresponding HU histogram and delta values (bottom).

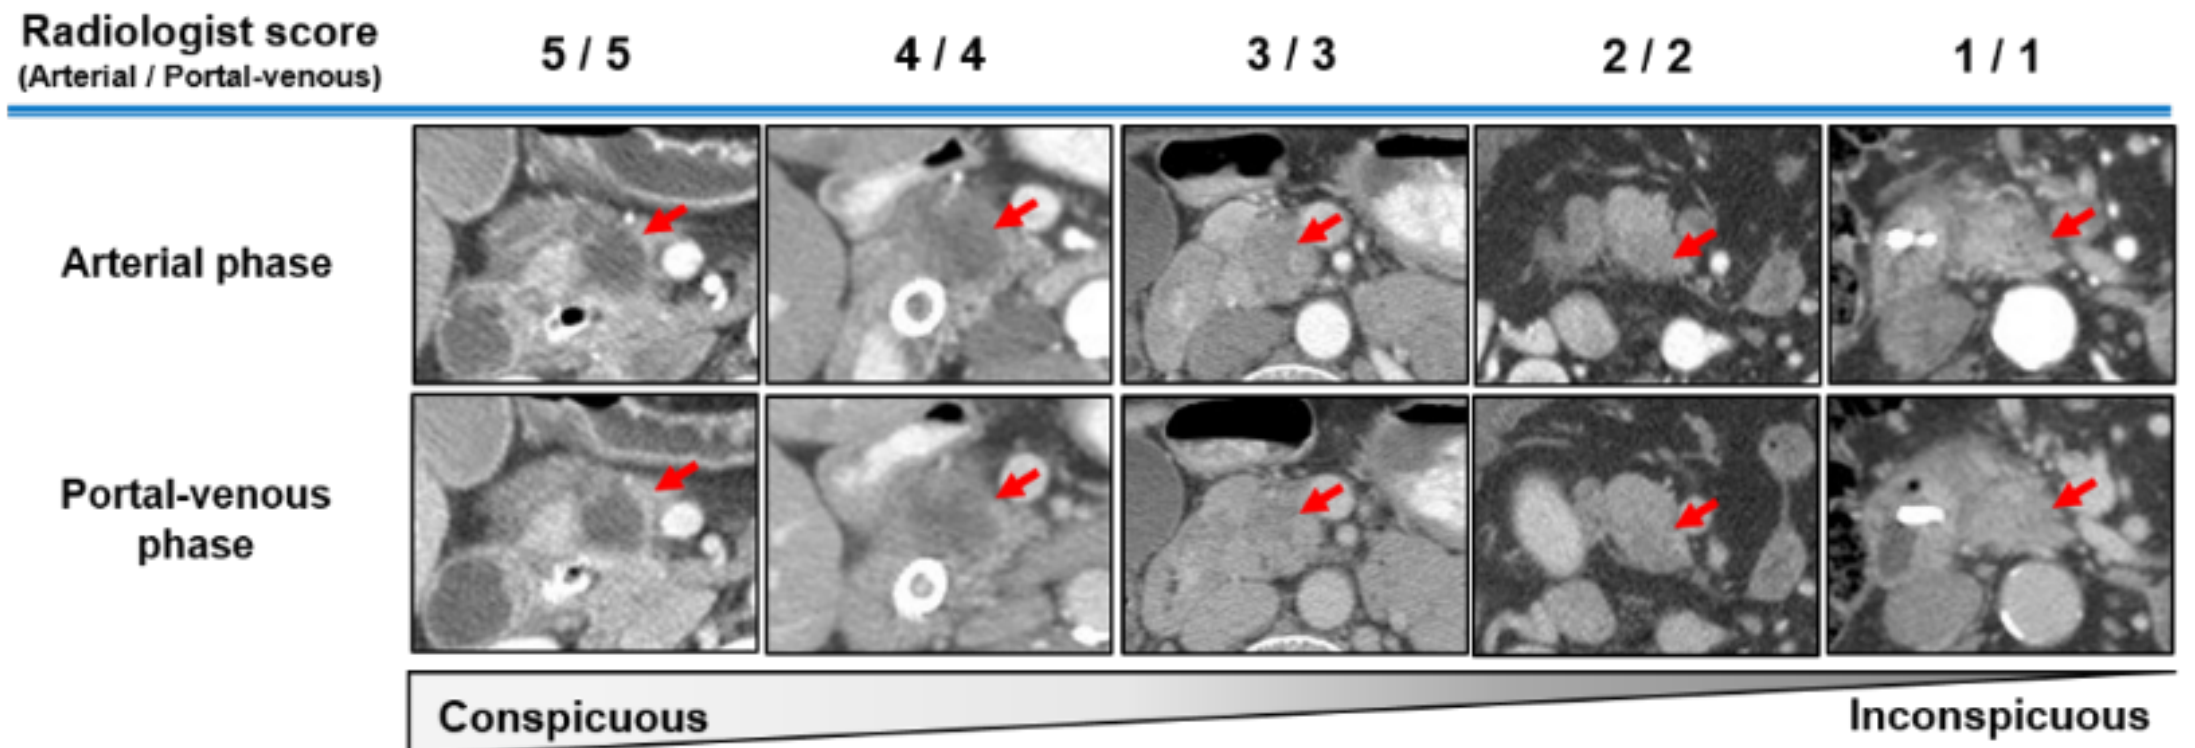

## Quantitative analysis (delta)

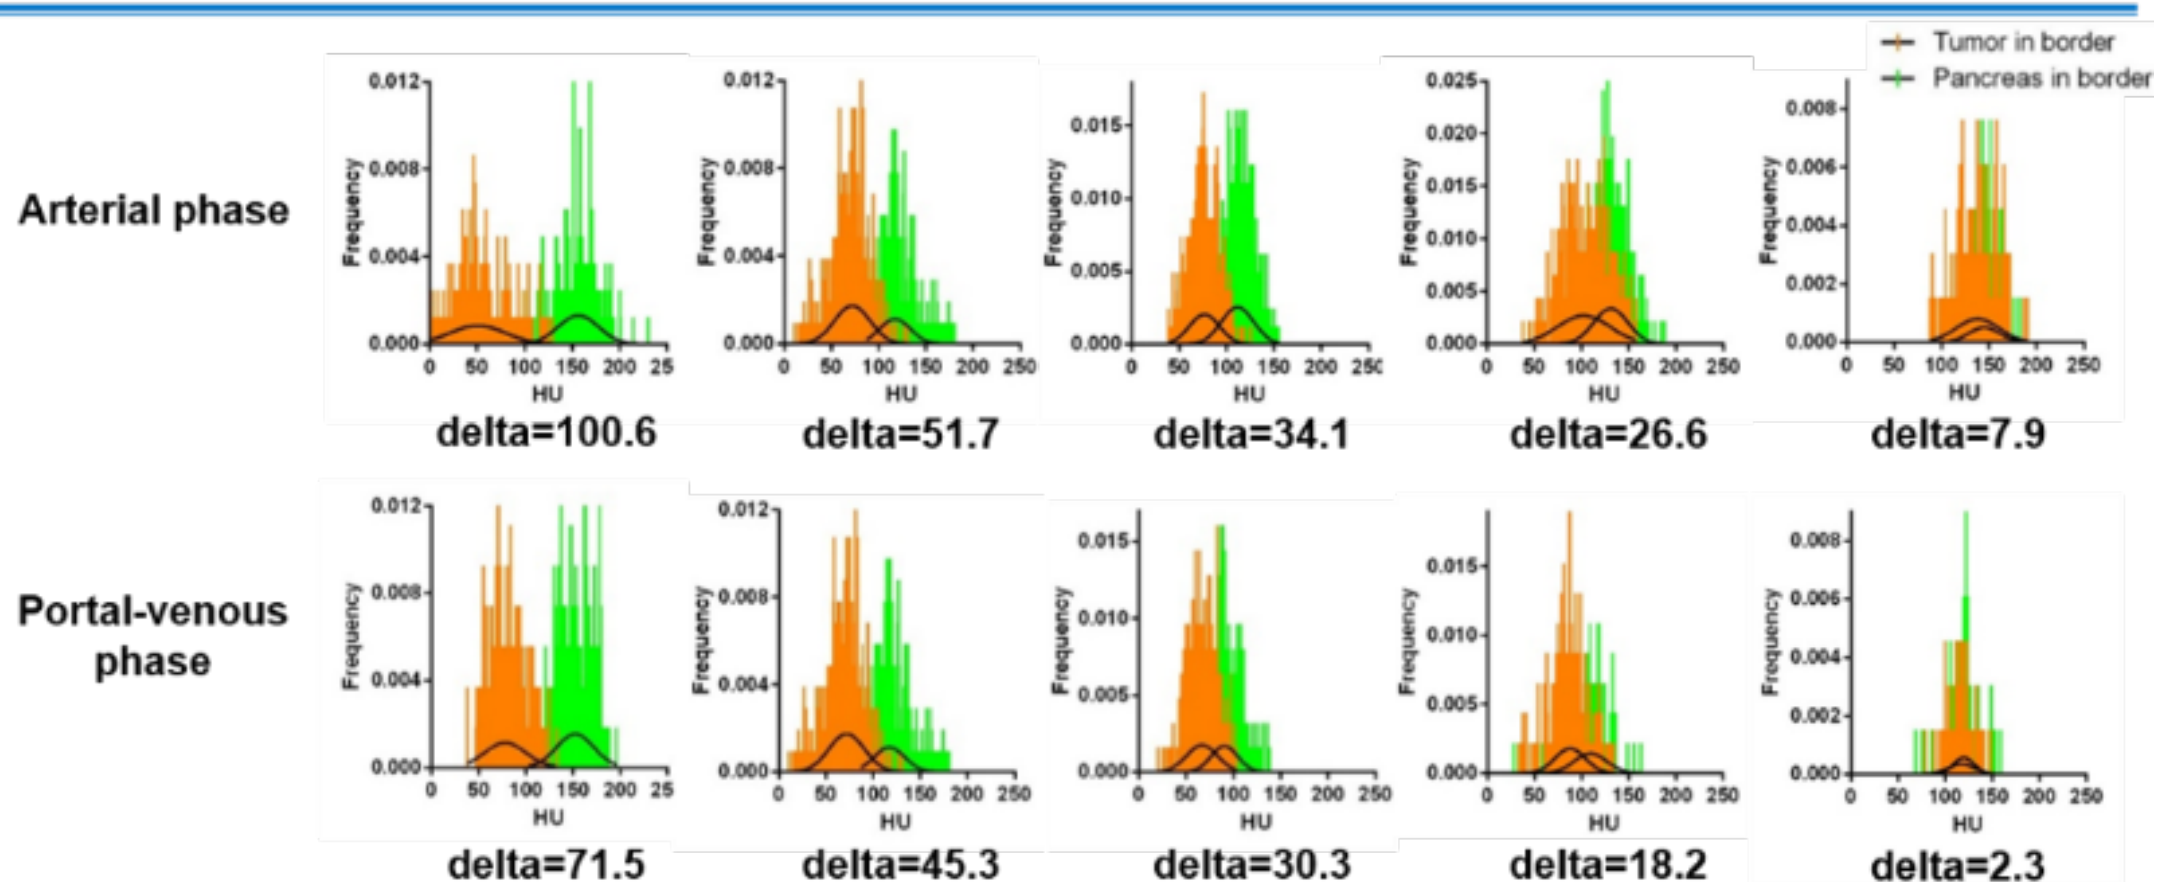

Delta values obtained from 12 patients (Table S1) who were enrolled on a prospective protocol of intraoperative gemcitabine infusion during PDAC resection.

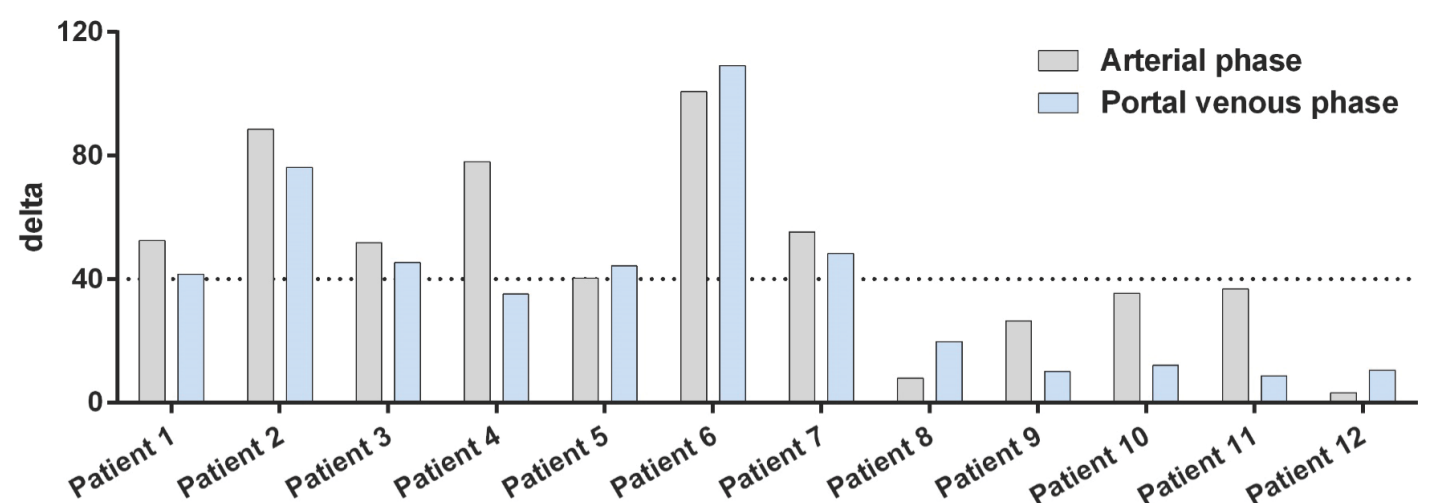

Score determined by two radiologists.

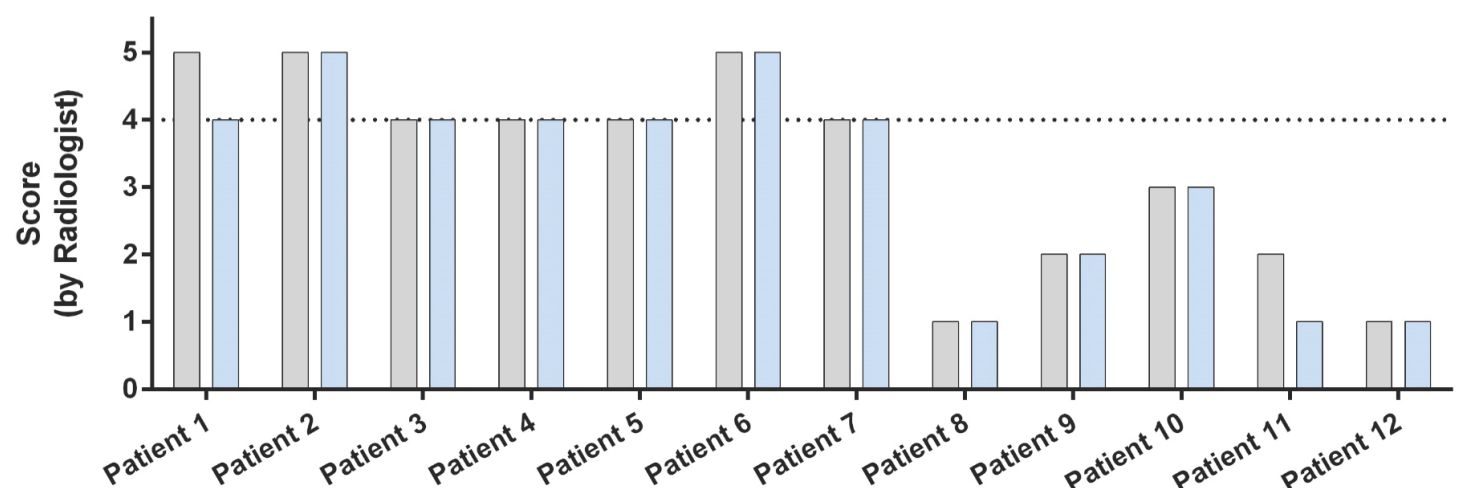

**Supplementary Fig. S3: ROC analysis to identify cutoff for delta measurement for patients in Supplementary Table S2.** (A) Comparison of area under the receiver operating characteristic (ROC) curves for the delta in the arterial phase. (B, C) The similarity was substantial between the conspicuity score (Fig. S1) of two radiologists (ET, PB) and the delta measurement (cutoff of 40) ((B) kappa coefficient: 0.8; (C) kappa coefficient: 0.7) (D) The two radiologists (ET, PB) had moderate agreement for the conspicuity scoring (kappa coefficient: 0.6) (E) The determination of the delta score for patients who had pancreatic protocol CT scans at baseline at an outside facility (OSF) had high concordance with MD Anderson Cancer Center (MDACC) scans.

(A)

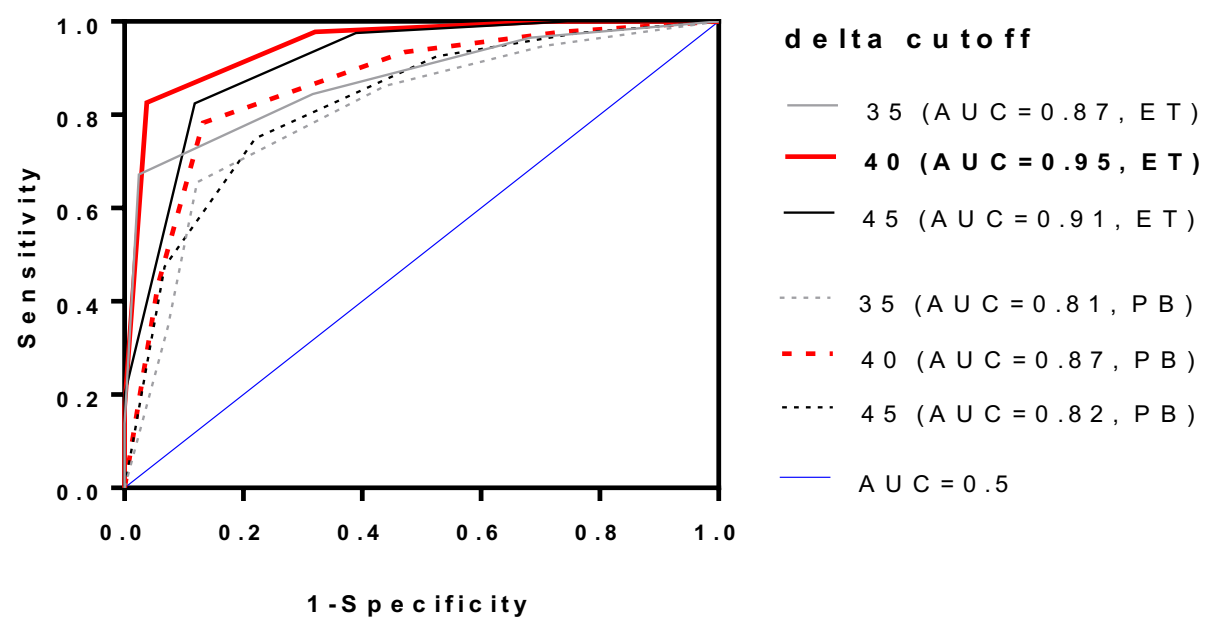

(B)

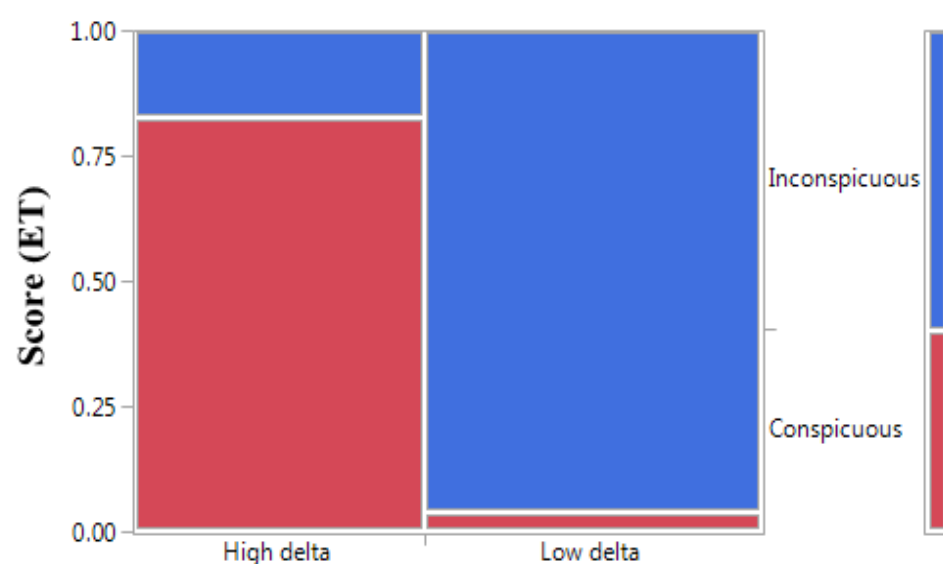

(C)

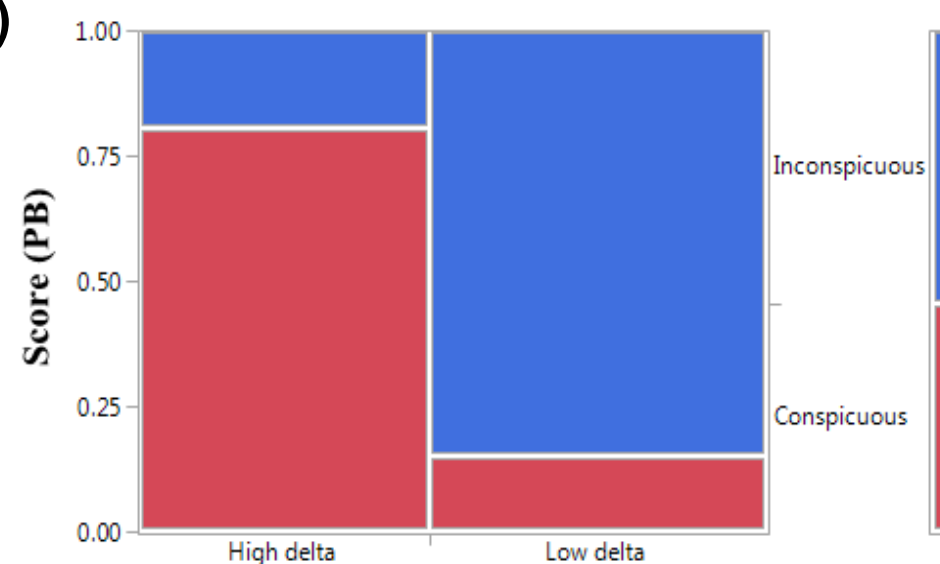

(D)

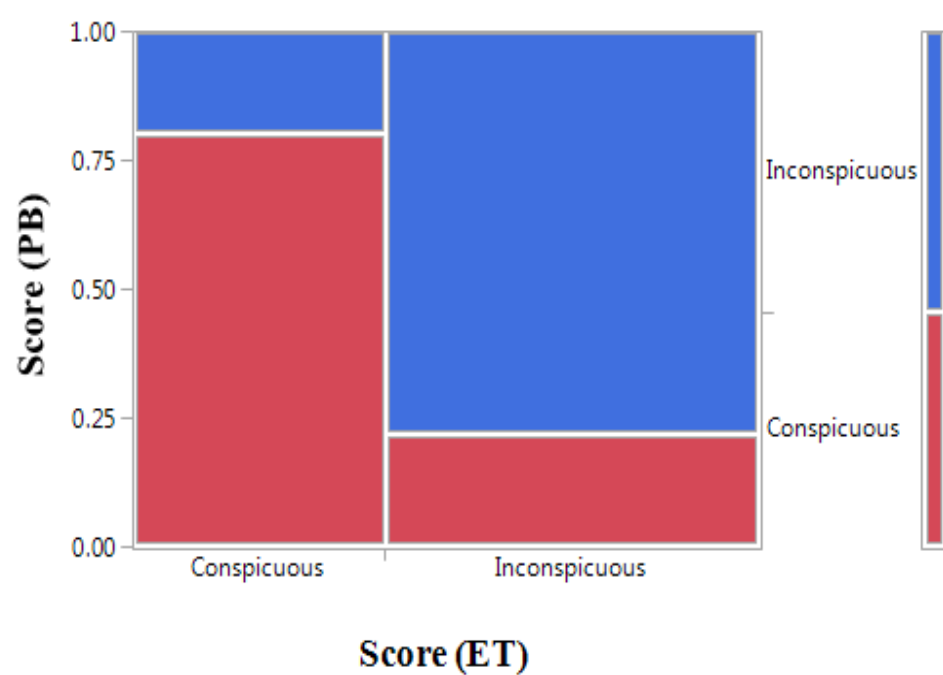

(E)

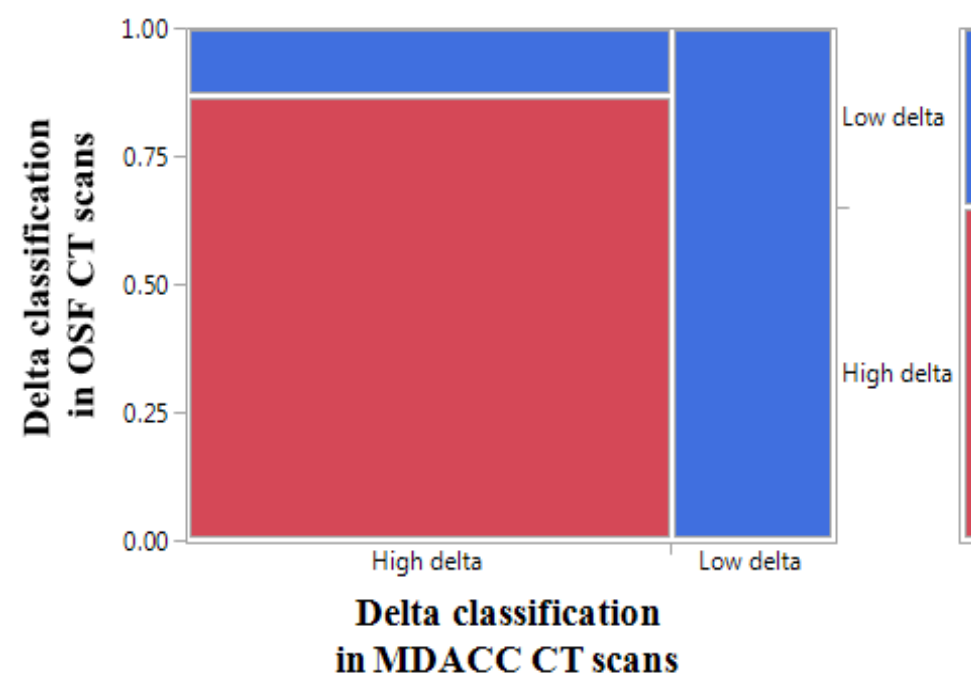

# Supplementary Fig. S4: Delta classification between internal and external CT scans.

The top graphs show the three discordant cases (red star). The figures at the bottom of the page show examples of concordant cases and discordant cases. The technique of contrast bolus and timing appeared to influence the delta classification.

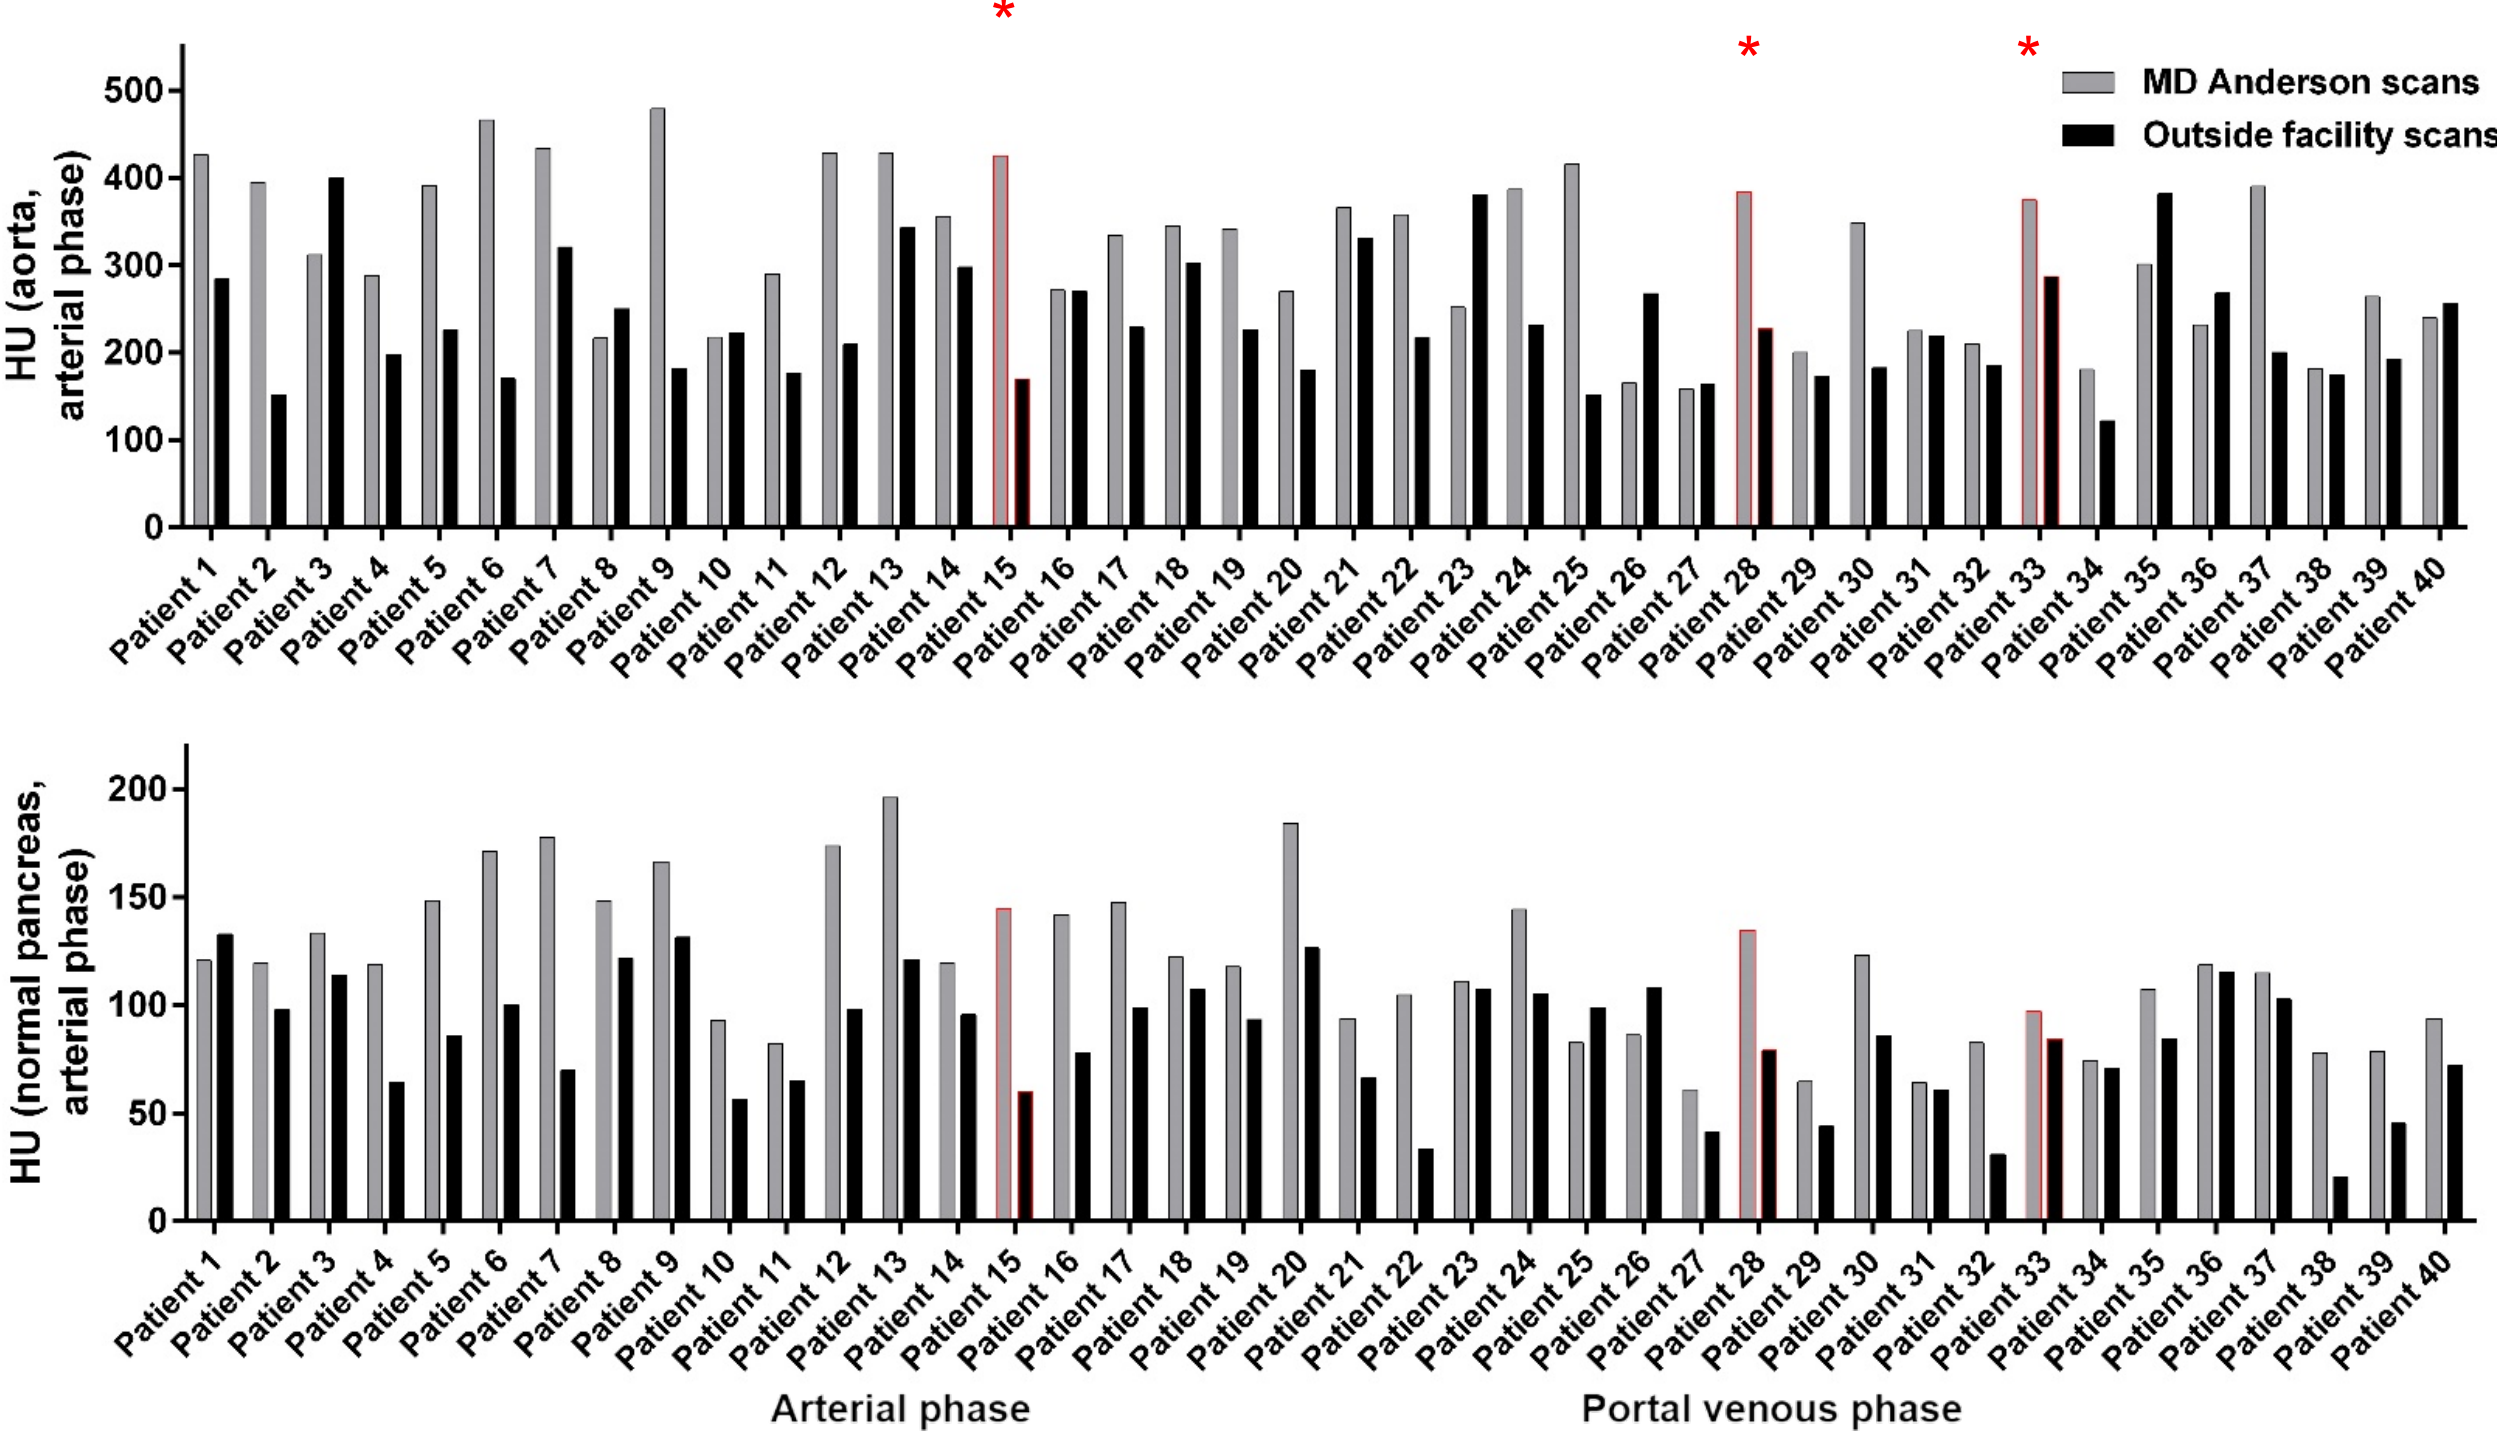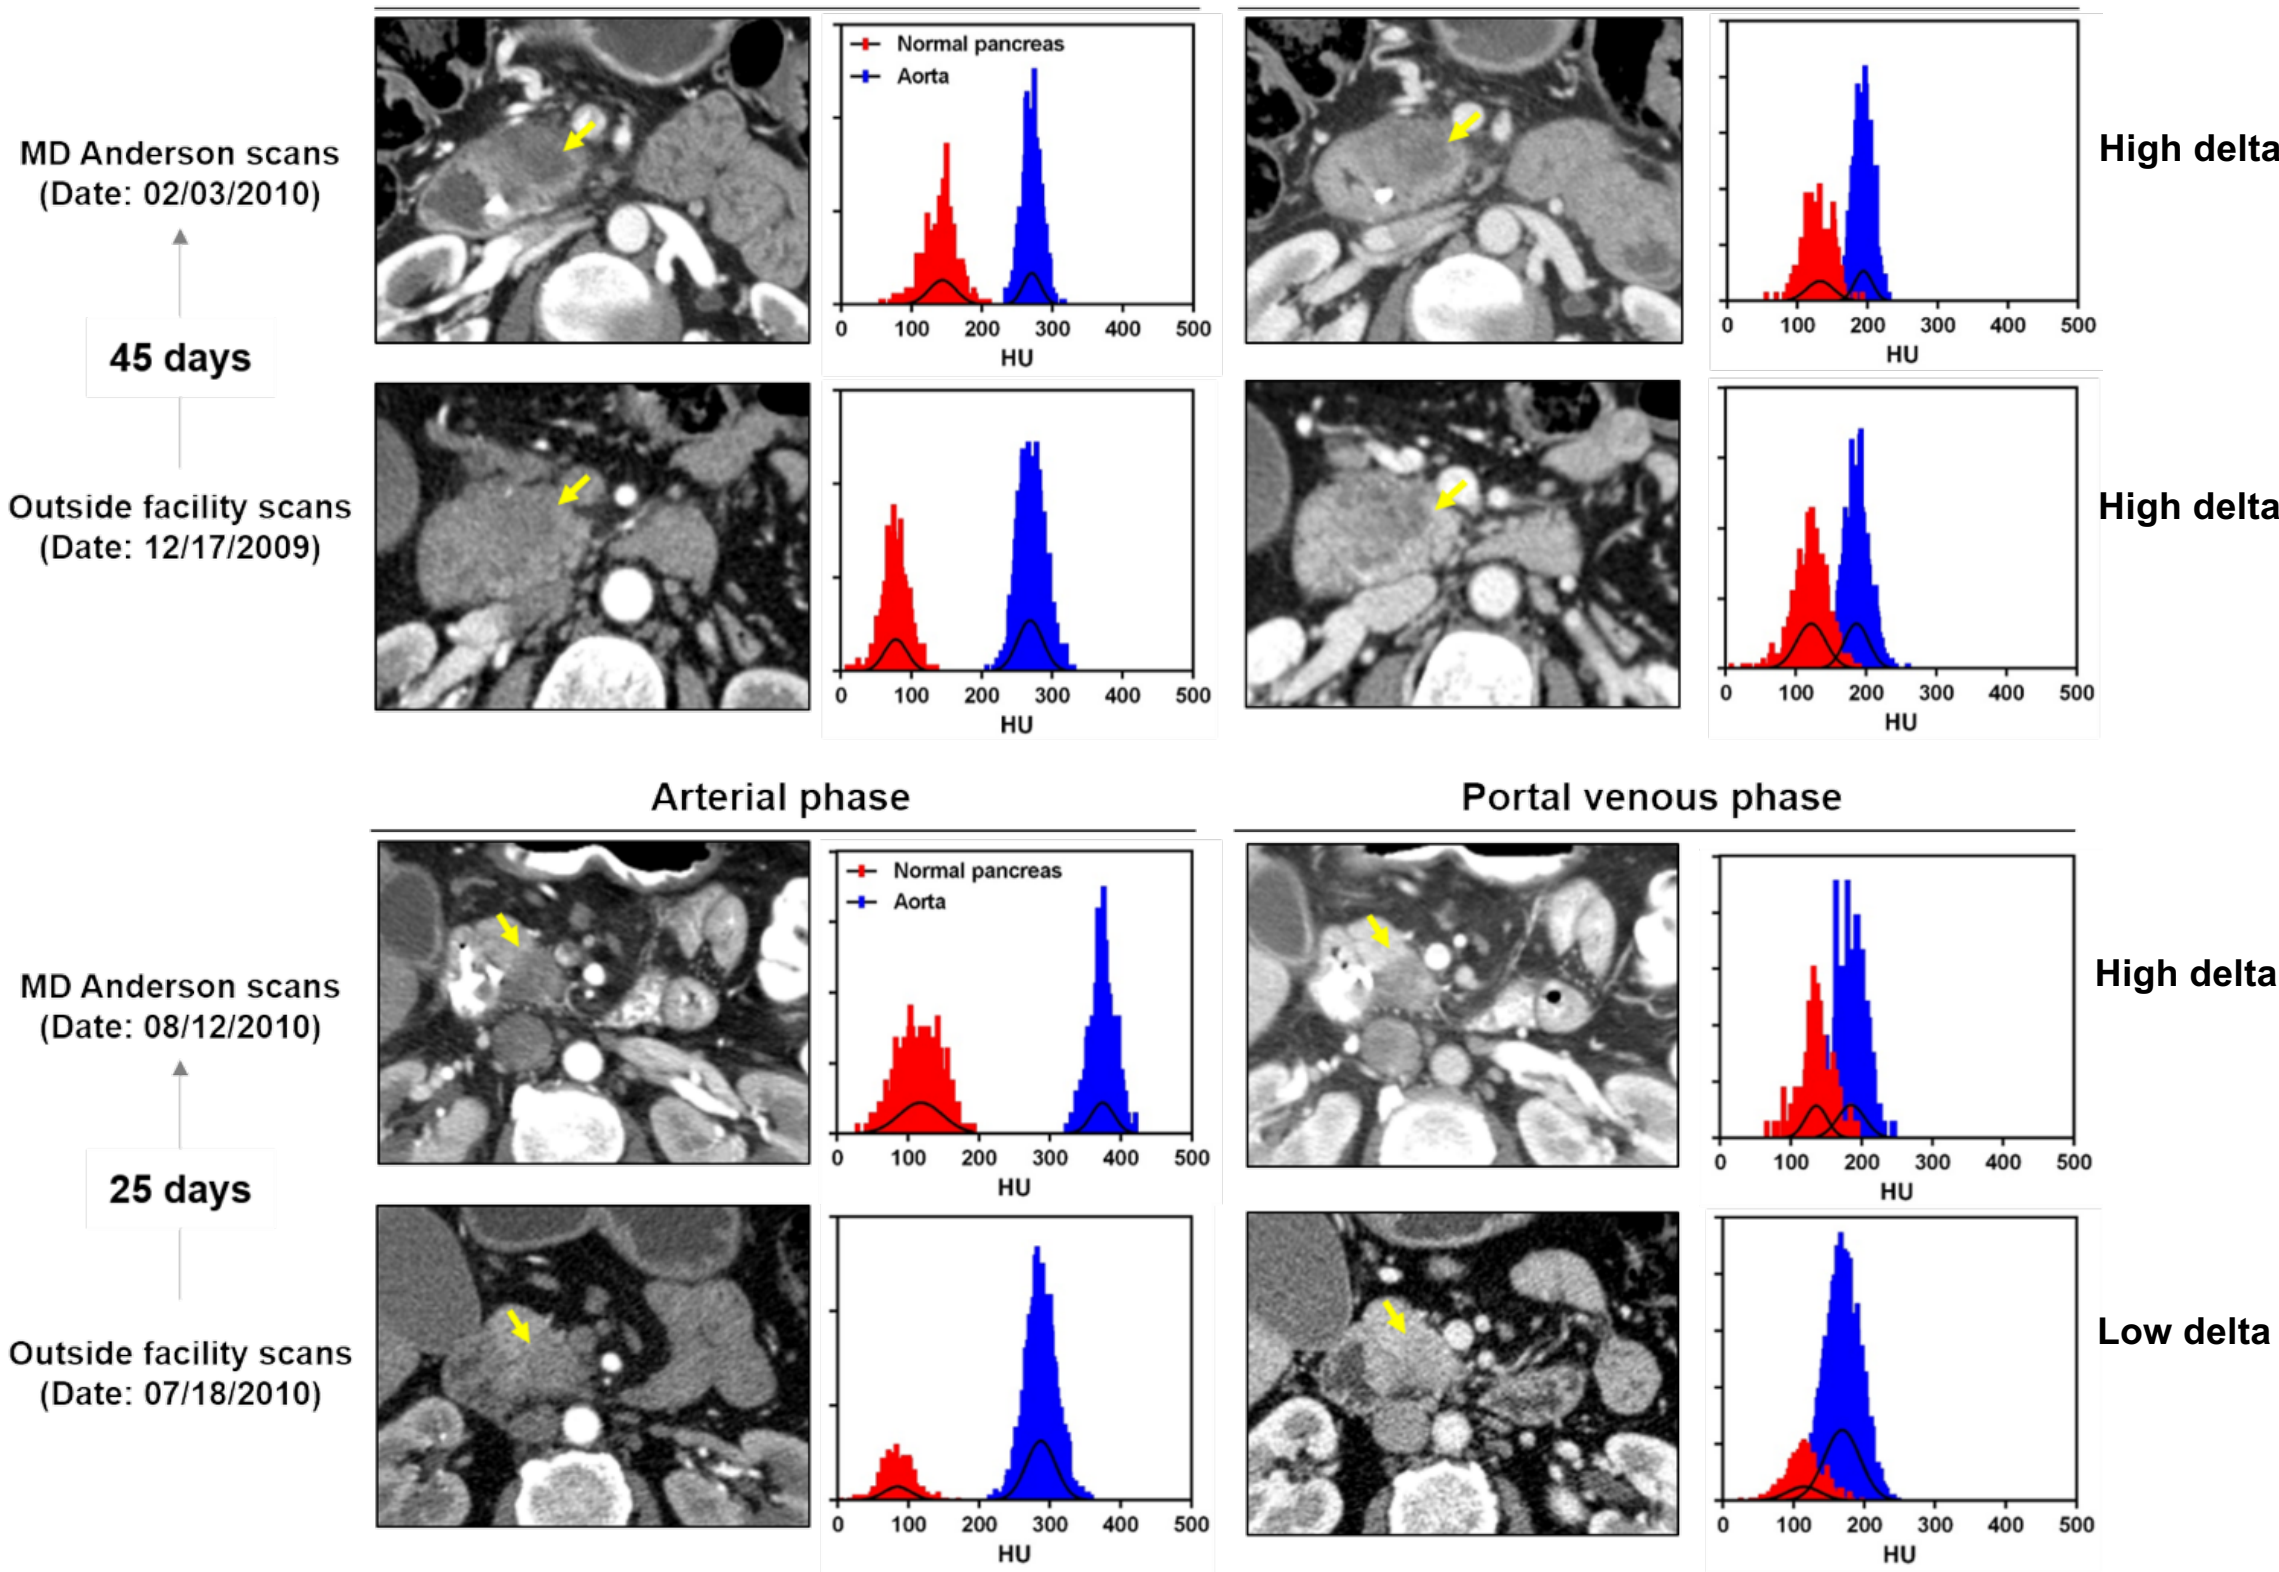



# Supplementary Fig. S6: Cell type identification with machine learning algorithm.

(A) Spectral library obtained from H&E stained slides. (B) Example of nucleus segmentation and cell type identification analysis of cancer, stroma cells, and lymphocytes. (C) The axis ratio is defined by the ratio of the lengths of the minor and major axis of objects. (D, E, F) Quality control of 12 slides. Note: Only images with cancer cells were selected for this analysis (see Methods).

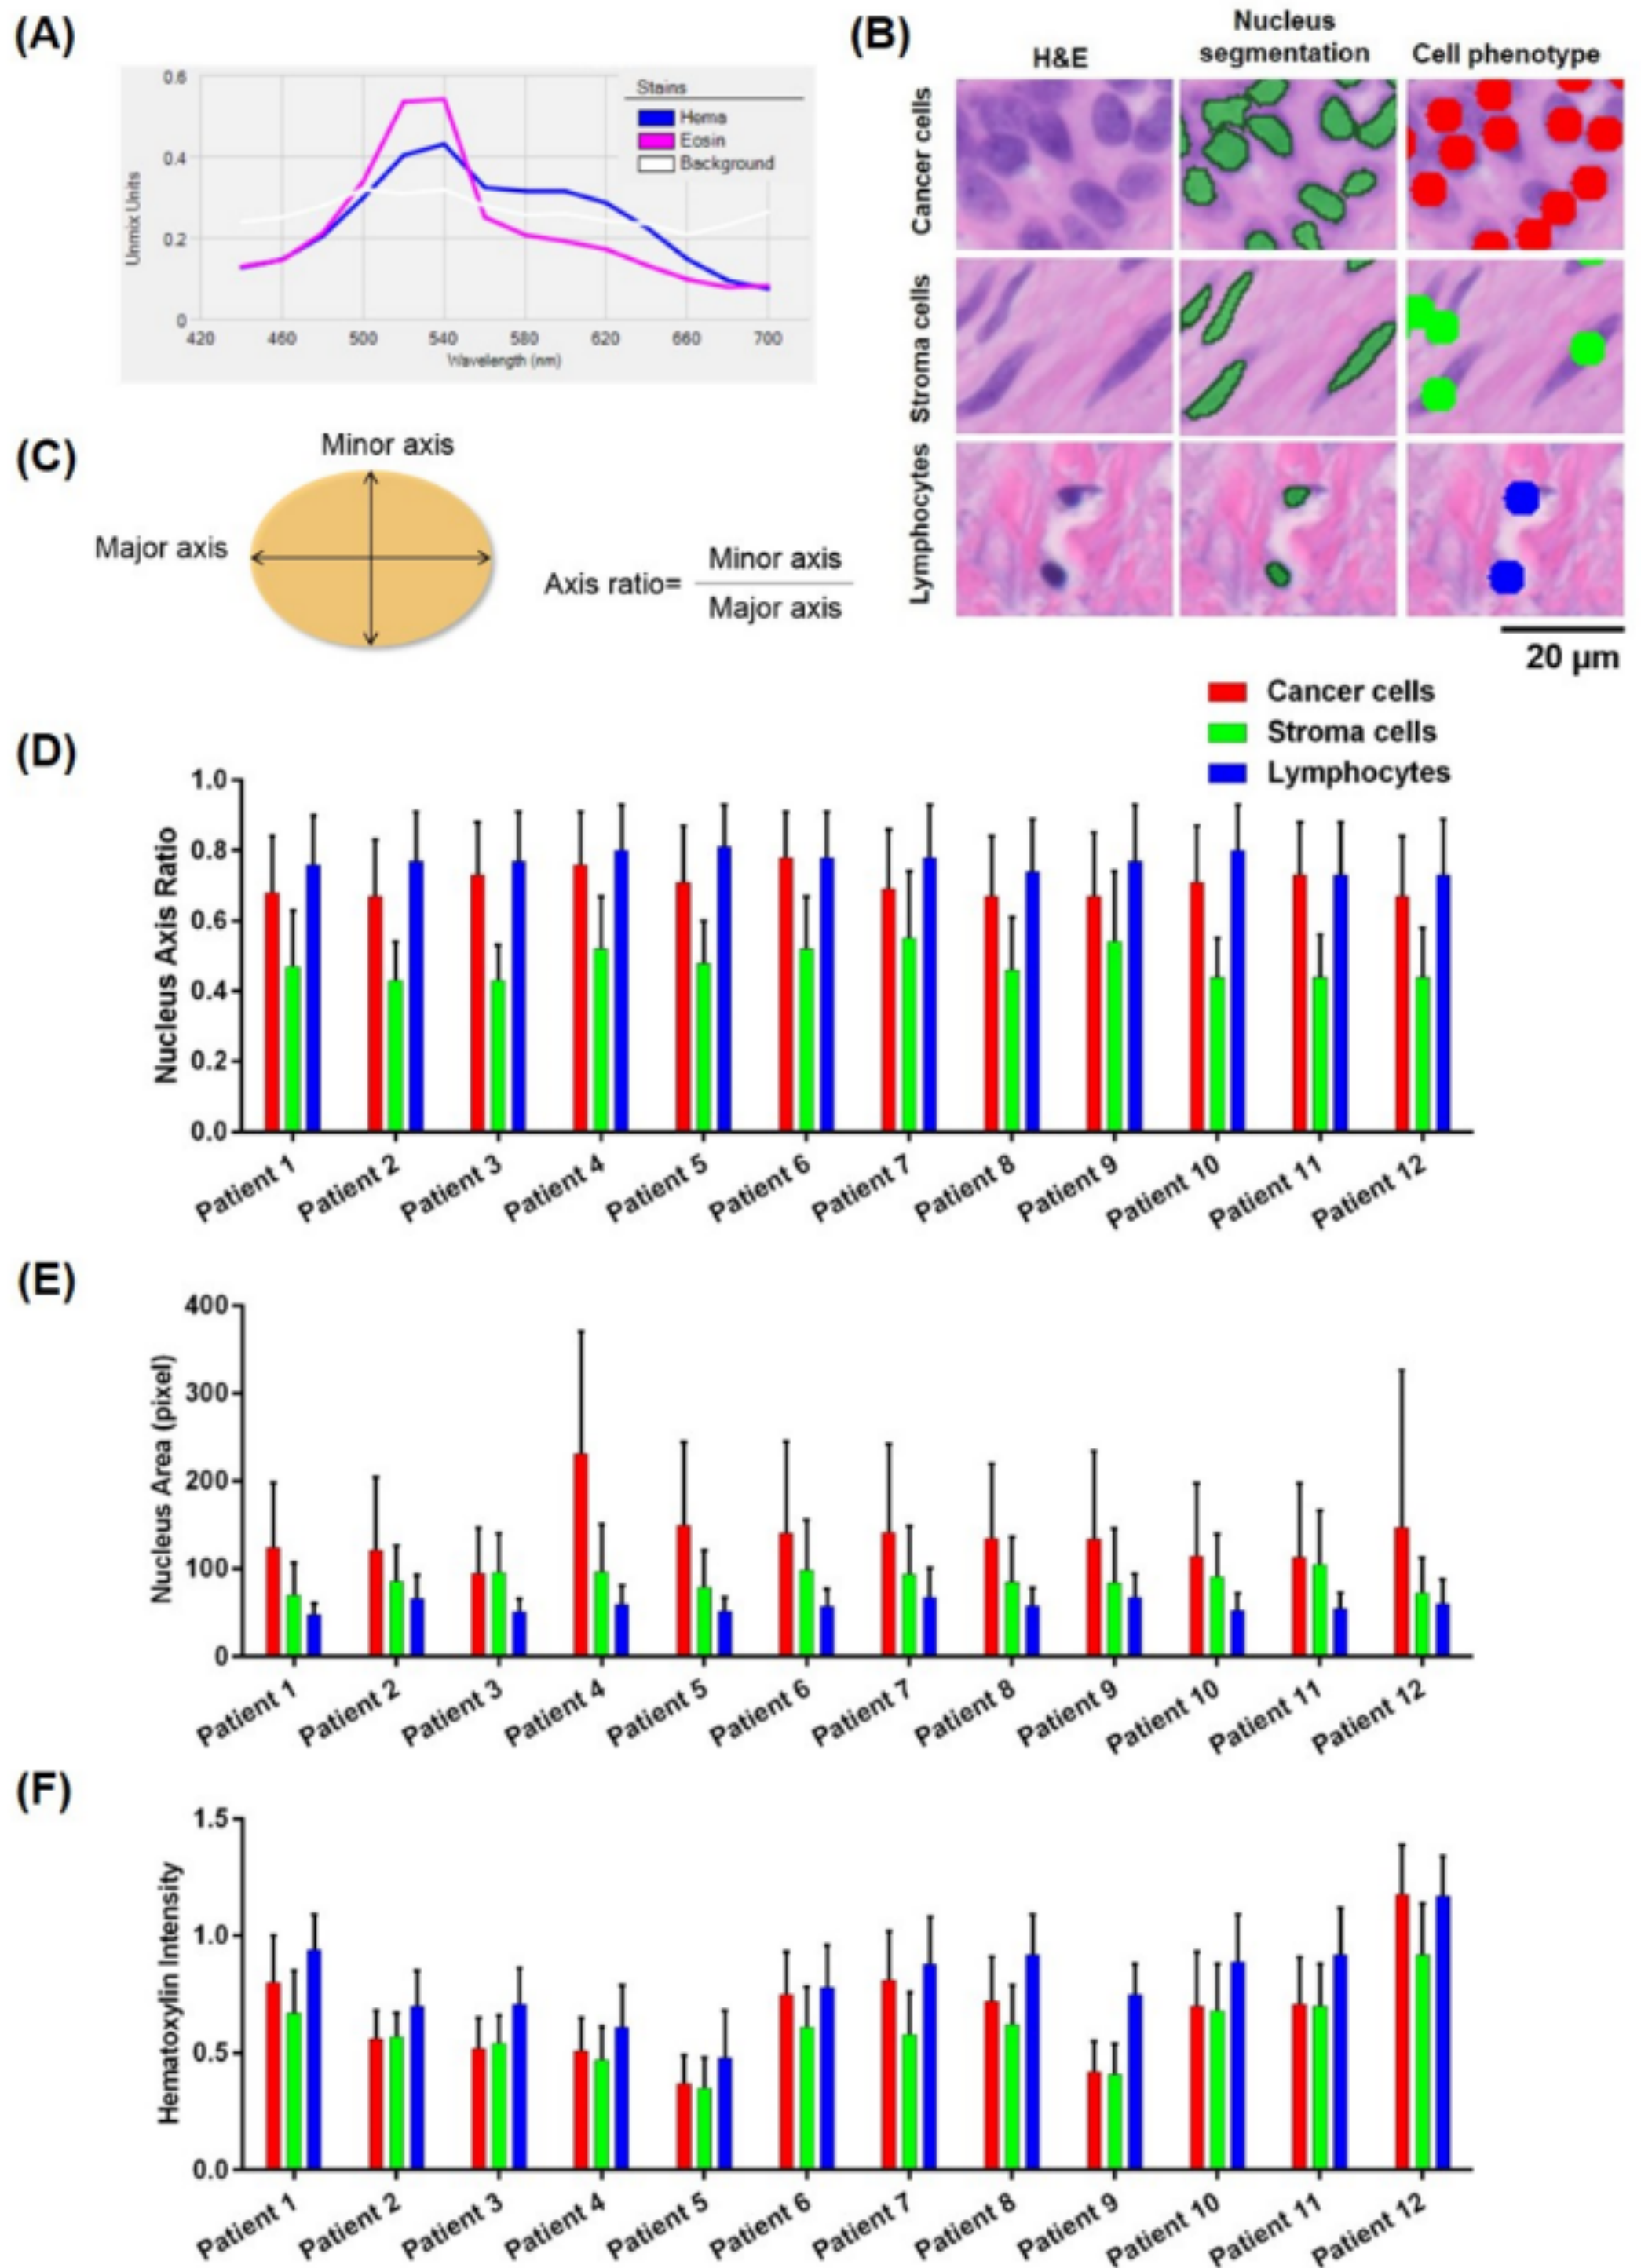

**Supplementary Fig. S7:** Validation of the proportions of cellular subtypes (A,B) and nucleus axis ratio (C) from pathology specimens from 17 more patients who underwent upfront resection for pancreatic cancer (i.e., no neoadjuvant therapy, part of the patients in Supplementary Table S2).

**(A)**

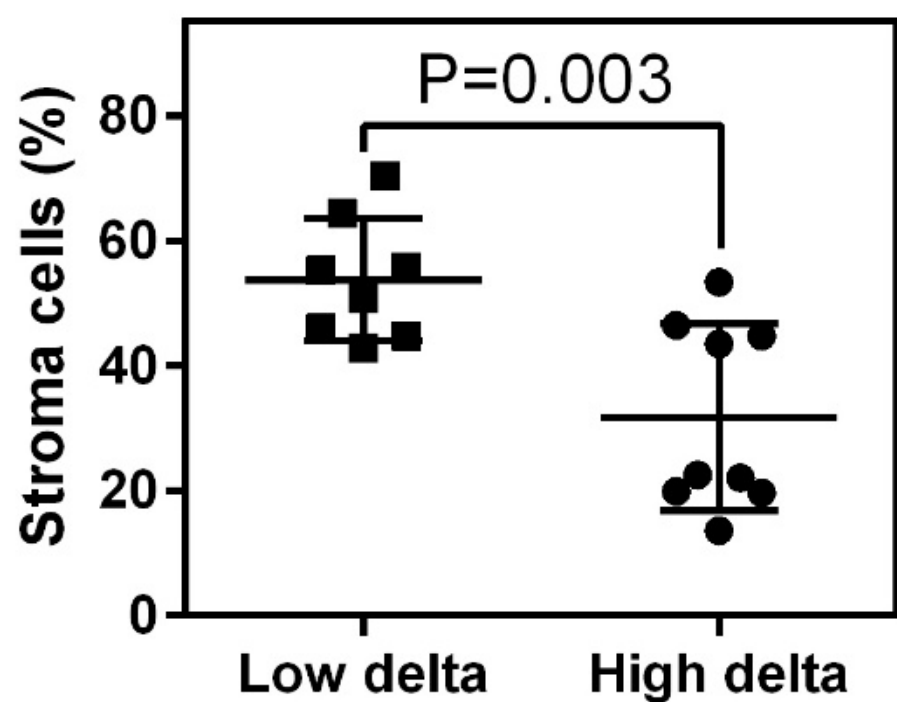

**(B)**

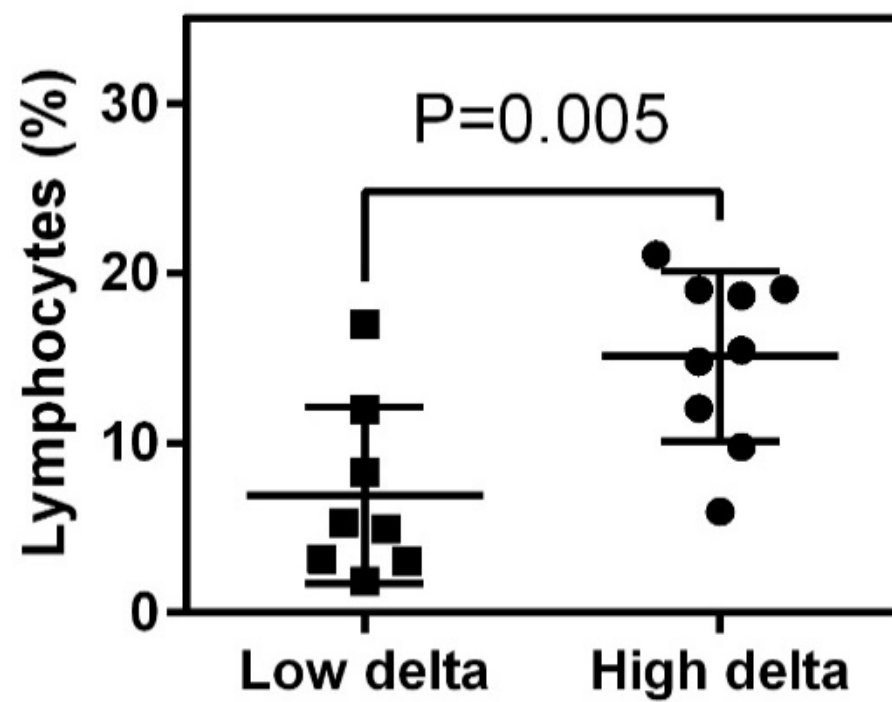

**(C)**

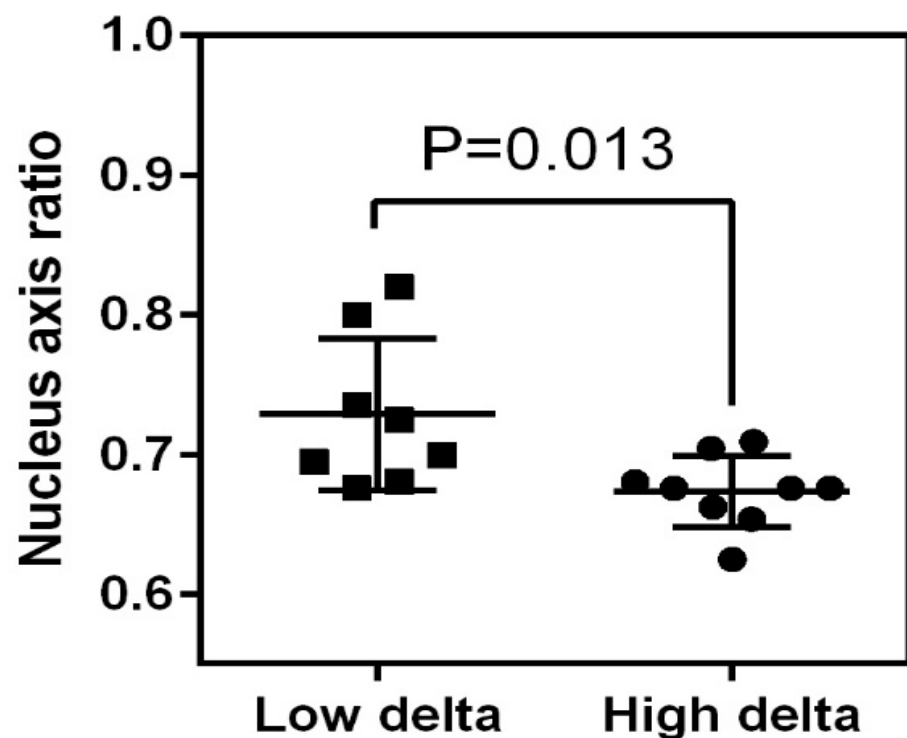



**Supplementary Fig. S8: Validation of machine learning algorithm in 17 additional patients who underwent upfront resection for pancreatic cancer (part of Supplementary Table S2).** Note: Only images with cancer cells were selected for this analysis (see Methods).

■ Cancer cells  
■ Stroma cells  
■ Lymphocytes

(A)

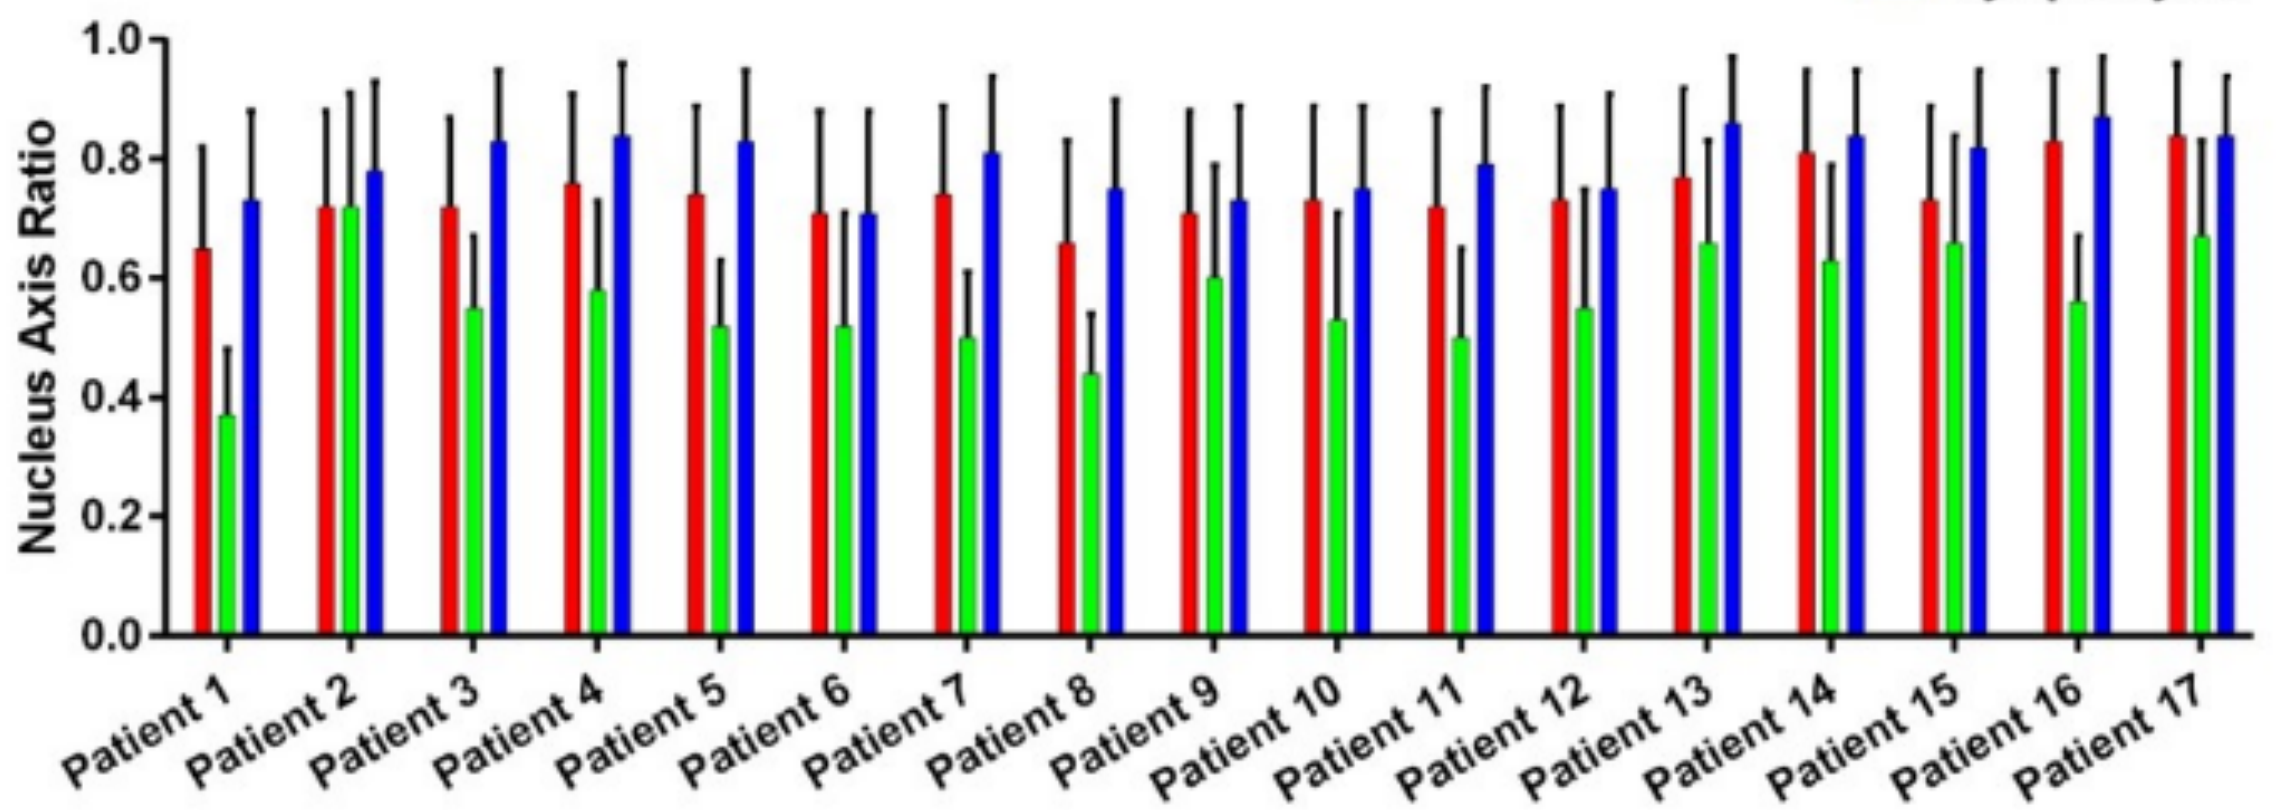

(B)

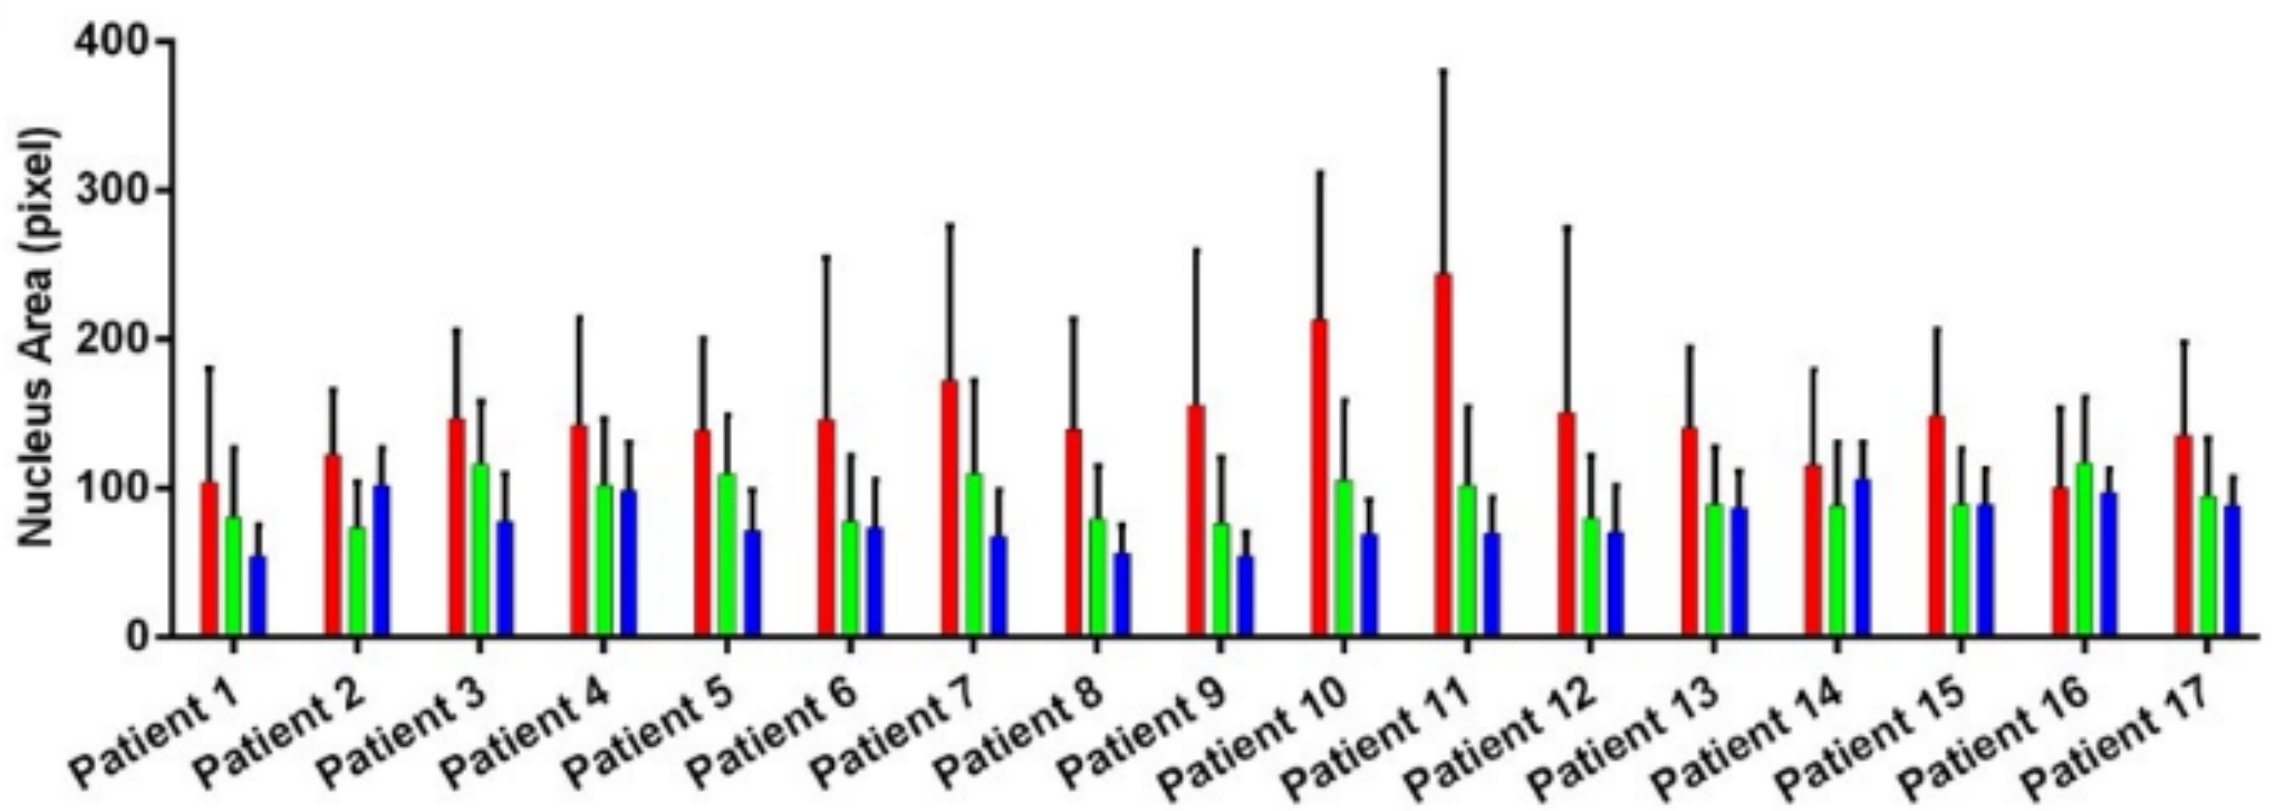

(C)

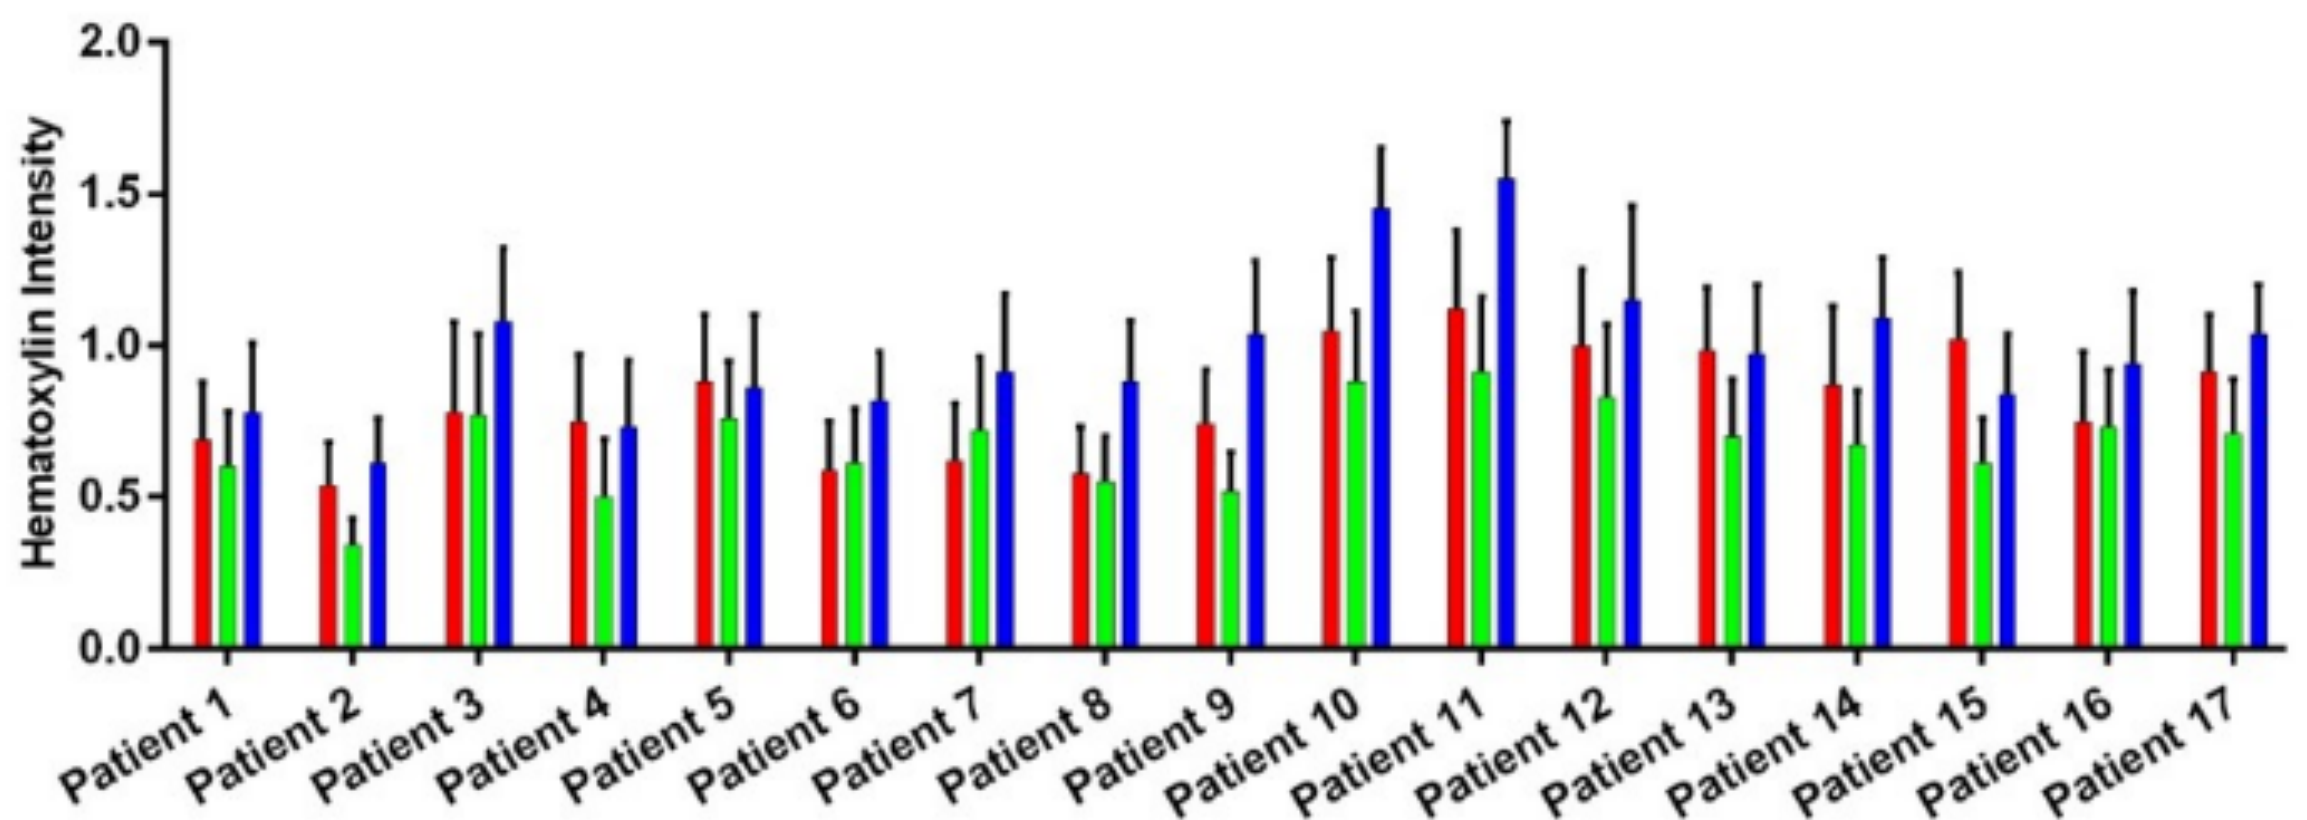

**Supplementary Fig. S9: Outcomes of patients with newly diagnosed stage IV PDAC by delta score.** (A) OS and (B) PFS (progression free survival) stratified by delta measurement for patients in Supplementary Table S4.

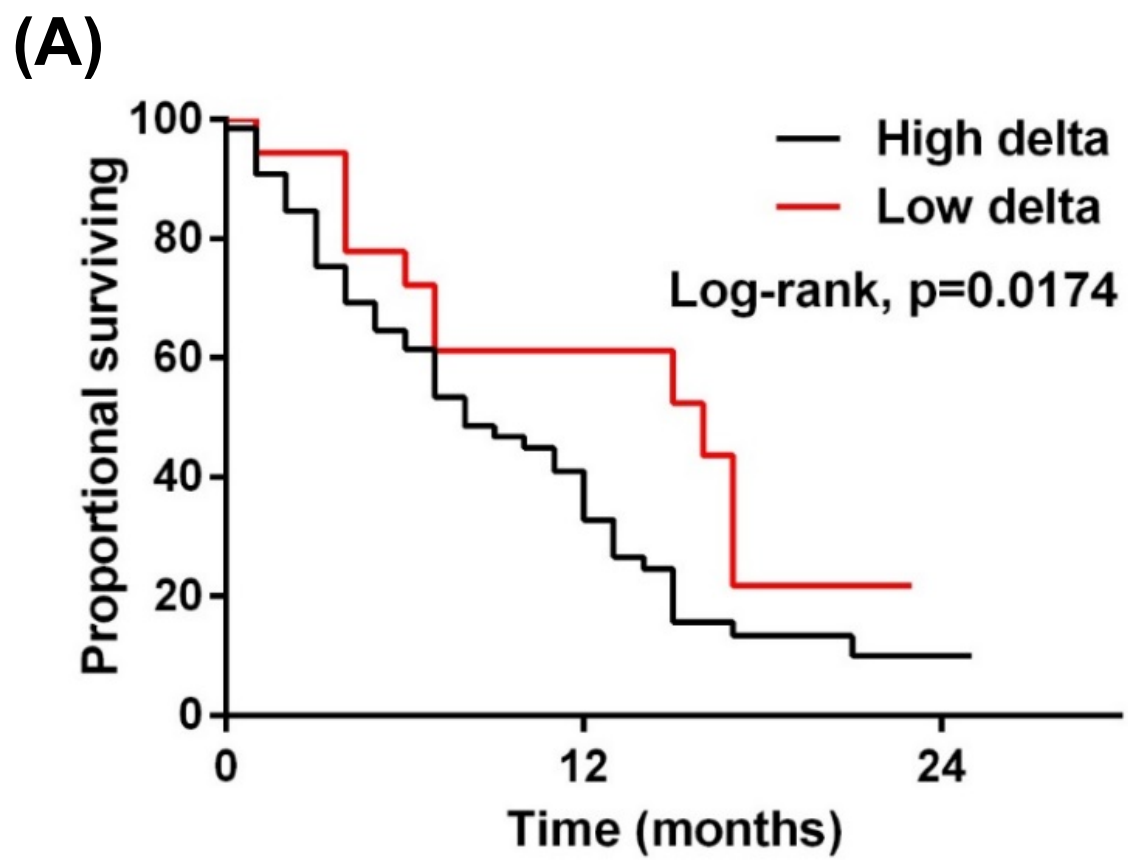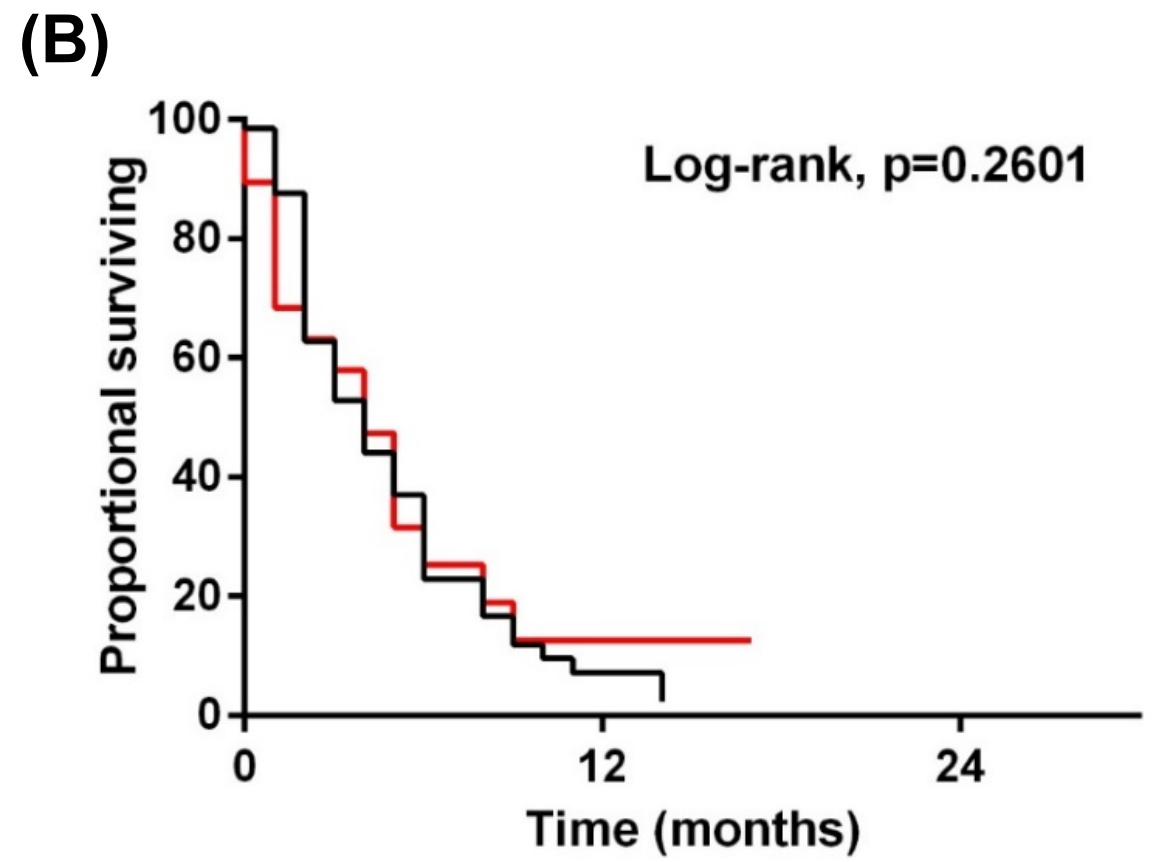

## Supplementary Fig. S10: Sensitivity analysis for delta measurement for patients with resectable PDAC.

Comparison of overall survival of subjects having high delta (Left:  $\geq 35$ ; Middle:  $\geq 40$ , Right:  $\geq 45$ ) or low delta tumors determined by quantitative analysis.

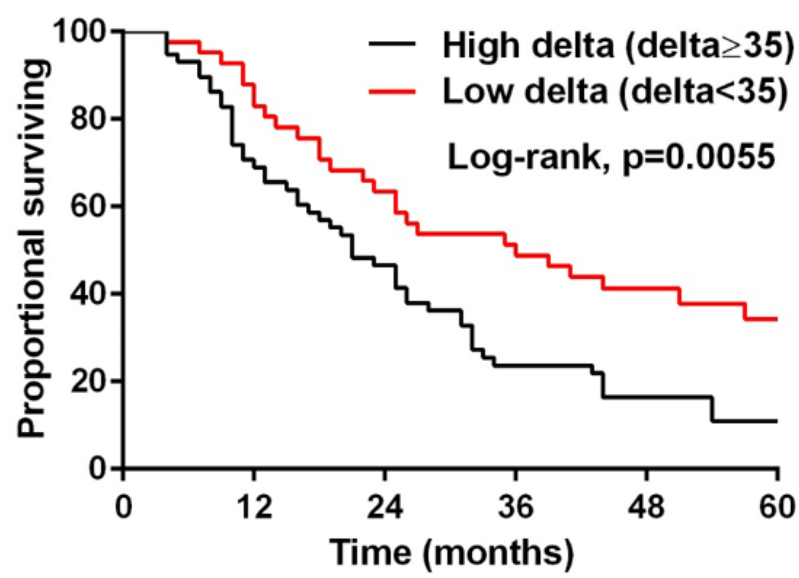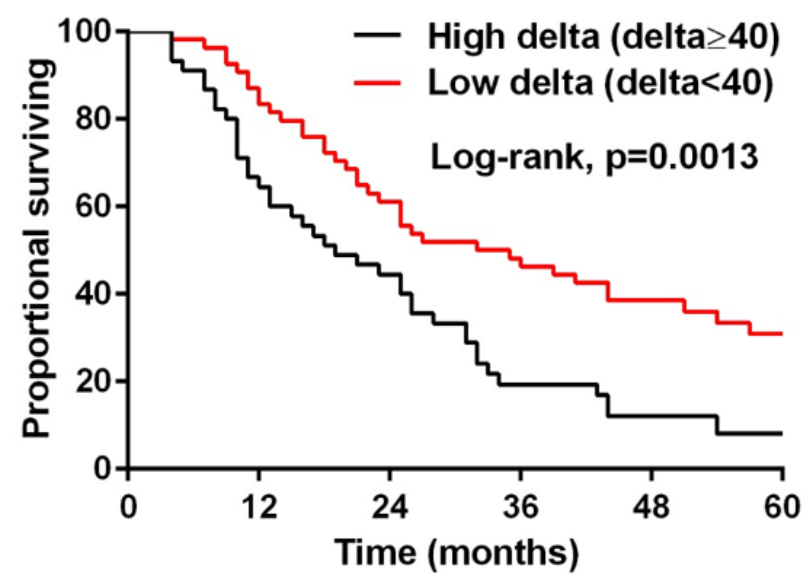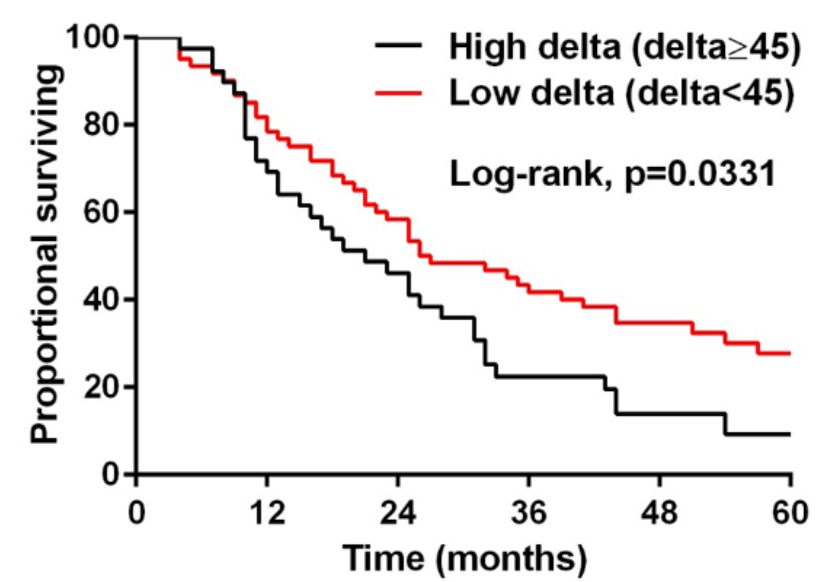

**Supplementary Fig. S11: Sensitivity analysis for visual score for PDAC conspicuity.** Comparison of overall survival of subjects having conspicuous tumor (A,C:  $\geq 3$ , B, D:  $\geq 4$ ) or inconspicuous tumors determined by two radiologists (A,B by ET; C,D by PB). See Supplementary Table S2 for patient characteristics. A cutoff of 4 in the visual classification (High delta  $\geq 4$ ) best classified the delta measurements with AUC values of 0.93 in arterial phase and 0.80 in portal venous phase for ET's visual score and 0.83 in arterial phase and 0.82 in portal venous phase for PB's visual score.

**(A)**

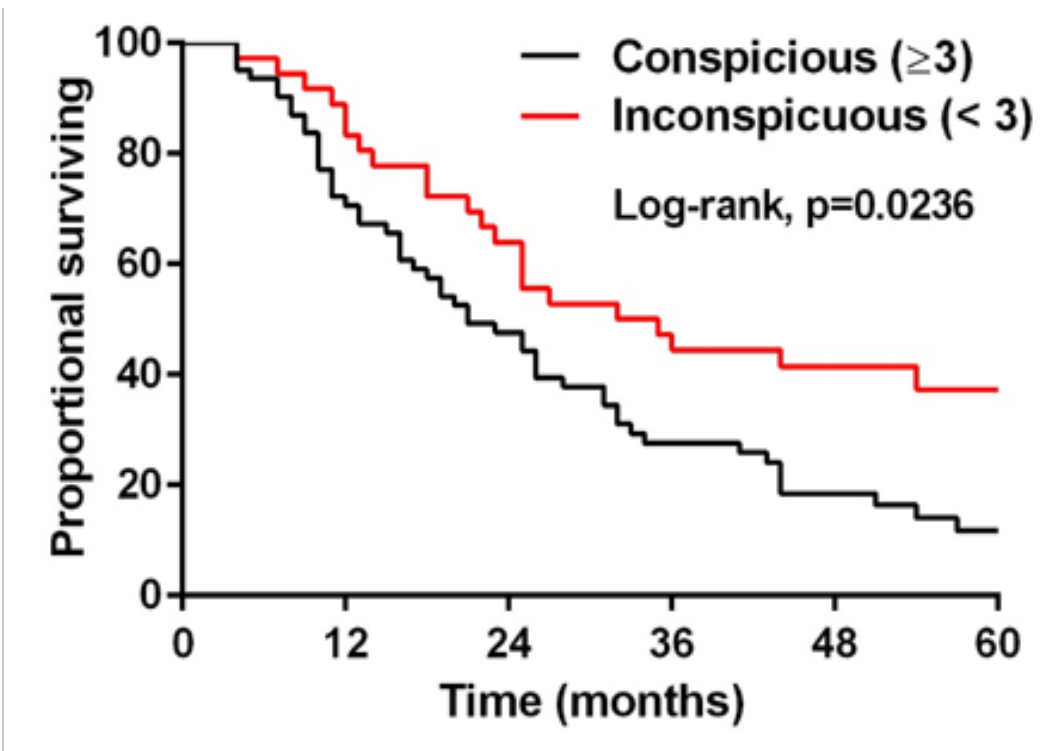

**(B)**

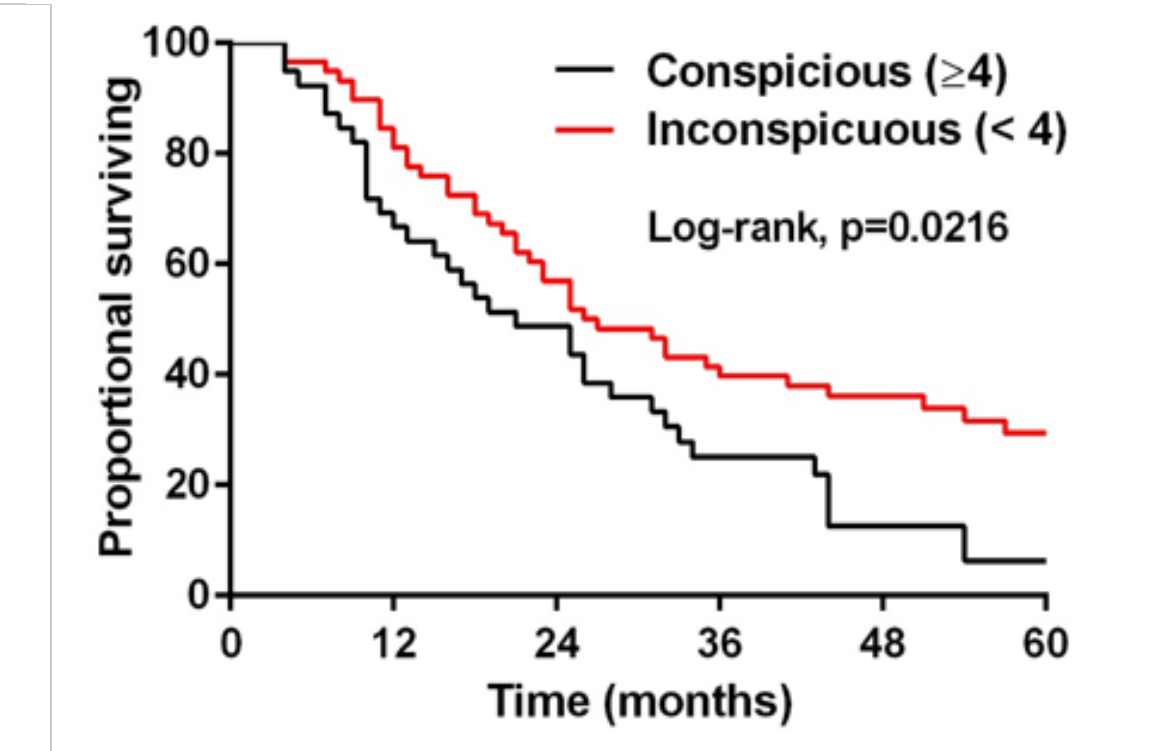

**(C)**

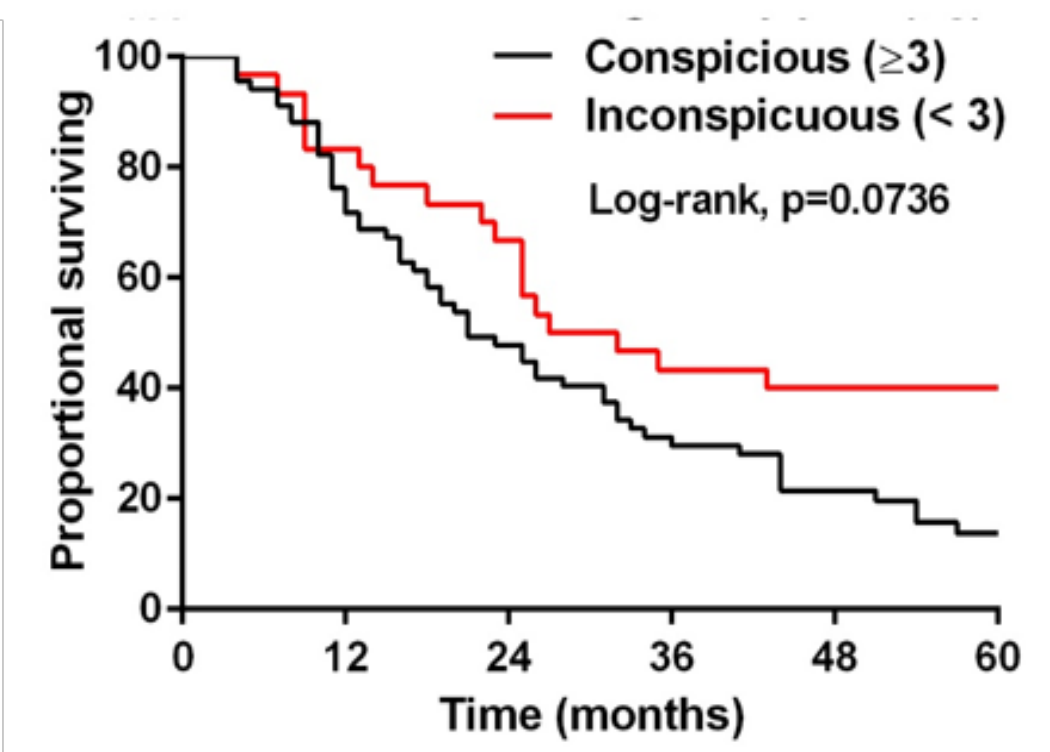

**(D)**

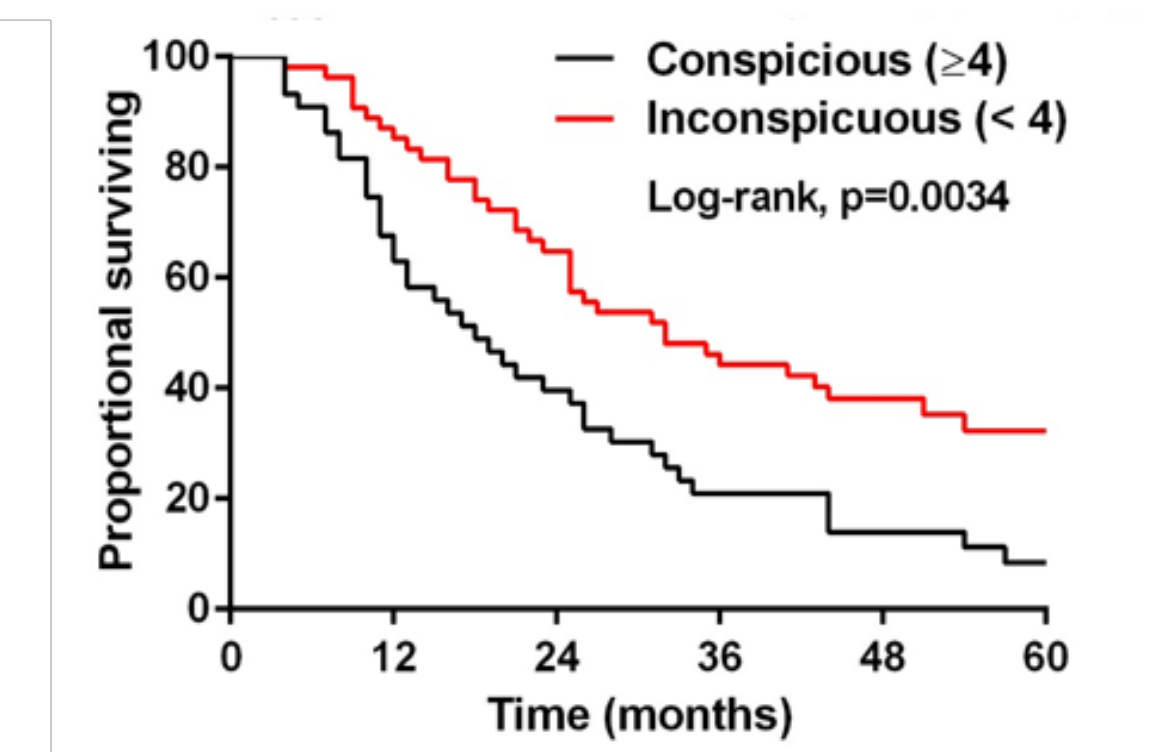

**Supplementary Fig. S12: Combined classification using delta and VAUC measurements.**

See Supplementary Table S3 for patient characteristics. (A) Proportions of low and high delta tumors achieving a near pathologic complete response to neoadjuvant therapy ( $\leq 10\%$  viable tumor cells; Fisher's Exact test,  $p=0.07$ ), (B) Proportions of high and low VAUC achieving a near complete response to neoadjuvant therapy (Fisher's Exact test,  $p=0.03$ ), (C) Proportions of tumors classified according to delta and VAUC (Class 1 Low delta/High VAUC; Class 2 Low delta/Low VAUC; Class 3 High delta/High VAUC; Class 4 High delta/Low VAUC), (Fisher's Exact test,  $p=0.06$ ), (D) Overall survival stratified by 4 classes for patients in Table S3 ( $n=106$ ).

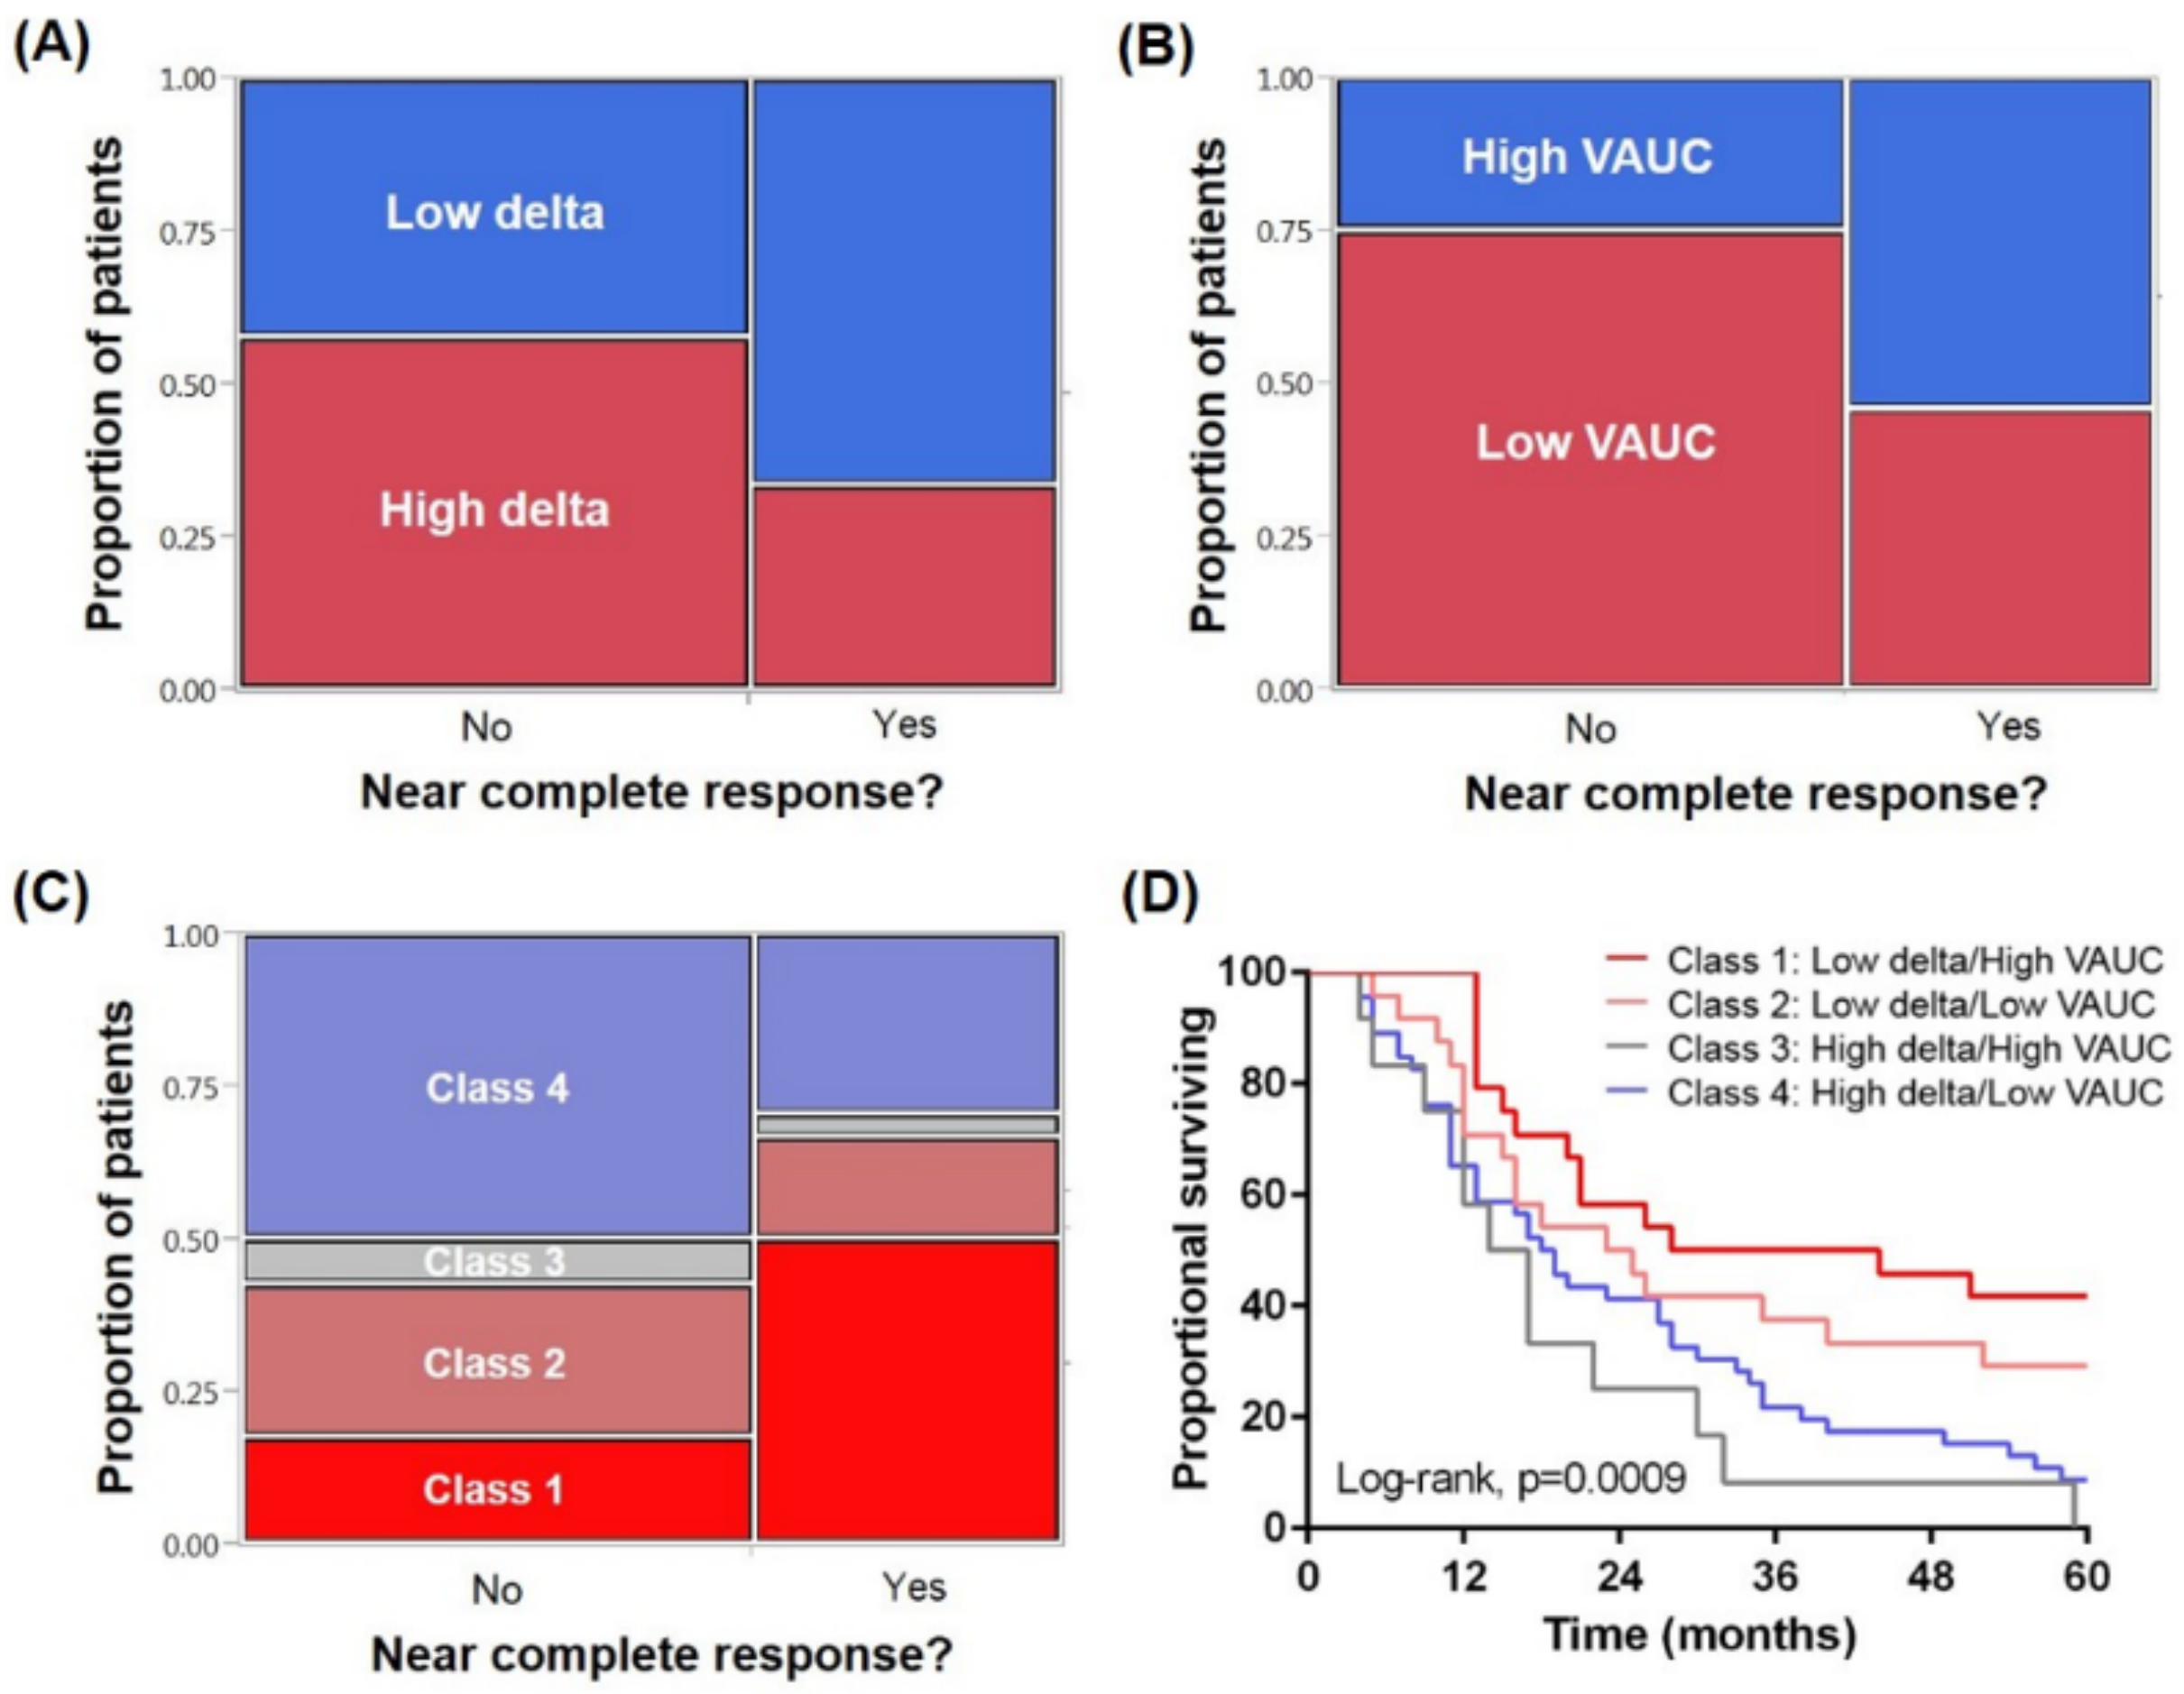

Supplement: NIHMS1503070-supplement-1.pdf [file NIHMS1503070-supplement-1.pdf]
